# Supplementary material for: Diversity, Virulence, and Antimicrobial Resistance in Isolates From the Newly Emerging Klebsiella pneumoniae ST101 Lineage
Source: Front Microbiol. 2019 Apr 2;10:542. doi: 10.3389/fmicb.2019.00542 (PMC6454207; doi:10.3389/fmicb.2019.00542)
Supplement: Supplementary file 1 [file Table_1.XLSX]

## Sheet: Sheet1
Table S1: Accession information for external genomes
Sample Name	Accession Number	Sequence Type
GCA_001874695.1_Klebsiella_pneumoniae_AR_0042_Contig	GCA_001874695	ST1
GCA_001887995.1_Klebsiella_pneumoniae_WCHKP1845_Contig	GCA_001887995	ST1
GCA_002108315.1_Klebsiella_pneumoniae_ARPG_315_Scaffold	GCA_002108315	ST1
GCA_002108345.1_Klebsiella_pneumoniae_ARPG_281_Scaffold	GCA_002108345	ST1
GCA_002248115.1_Klebsiella_pneumoniae_KPCTRSRTH07_Contig	GCA_002248115	ST1
GCA_002852995.2_Klebsiella_pneumoniae_SCKP020049_Complete_Genome	GCA_002852995	ST1
GCA_002853465.1_Klebsiella_pneumoniae_ozaenae_SCKP020136_Scaffold	GCA_002853465	ST1
GCA_002853475.1_Klebsiella_pneumoniae_ozaenae_SCKP020135_Scaffold	GCA_002853475	ST1
GCA_001316495.2_Klebsiella_pneumoniae_ST101_950171785_Contig	GCA_001316495	ST101
GCA_001316565.3_Klebsiella_pneumoniae_ST101_960186733_Complete_Genome	GCA_001316565	ST101
GCA_001316645.2_Klebsiella_pneumoniae_ST101_951373950_Contig	GCA_001316645	ST101
GCA_001316695.2_Klebsiella_pneumoniae_ST101_945165838_Contig	GCA_001316695	ST101
GCA_001316745.2_Klebsiella_pneumoniae_ST101_945169659_Contig	GCA_001316745	ST101
GCA_001316785.2_Klebsiella_pneumoniae_ST101_950173000_Contig	GCA_001316785	ST101
GCA_001316895.2_Klebsiella_pneumoniae_ST2016_951362657_Contig	GCA_001316895	ST101
GCA_001316955.2_Klebsiella_pneumoniae_ST101_957083896_Contig	GCA_001316955	ST101
GCA_001316985.2_Klebsiella_pneumoniae_ST101_951384356_Contig	GCA_001316985	ST101
GCA_001317005.2_Klebsiella_pneumoniae_ST101_957089165_Contig	GCA_001317005	ST101
GCA_001317015.2_Klebsiella_pneumoniae_ST101_957083320_Contig	GCA_001317015	ST101
GCA_001317035.2_Klebsiella_pneumoniae_ST101_U44822_26_7_13_Contig	GCA_001317035	ST101
GCA_001317165.2_Klebsiella_pneumoniae_ST101_939996824_Contig	GCA_001317165	ST101
GCA_001317295.2_Klebsiella_pneumoniae_ST101_951363981_Contig	GCA_001317295	ST101
GCA_001317375.2_Klebsiella_pneumoniae_ST101_945154233_Contig	GCA_001317375	ST101
GCA_001463615.1_Klebsiella_pneumoniae_50752501_Contig	GCA_001463615	ST101
GCA_001720745.1_Klebsiella_pneumoniae_CFSAN044573_Contig	GCA_001720745	ST101
GCA_001720815.1_Klebsiella_pneumoniae_CFSAN044572_Contig	GCA_001720815	ST101
GCA_001902435.1_Klebsiella_pneumoniae_Kp_Goe_33208_Complete_Genome	GCA_001902435	ST101
GCA_001902515.1_Klebsiella_pneumoniae_Kp_Goe_71070_Complete_Genome	GCA_001902515	ST101
GCA_001913175.1_Klebsiella_pneumoniae_Kp_Goe_121641_Complete_Genome	GCA_001913175	ST101
GCA_002093155.1_Klebsiella_pneumoniae_Kleb_Syr_Scaffold	GCA_002093155	ST101
GCA_002187295.1_Klebsiella_pneumoniae_G3504_Contig	GCA_002187295	ST101
GCA_002187855.1_Klebsiella_pneumoniae_PO1407_Contig	GCA_002187855	ST101
GCA_002189255.1_Klebsiella_pneumoniae_C11_E7_15_Contig	GCA_002189255	ST101
GCA_002189265.1_Klebsiella_pneumoniae_C6_E2_14_Contig	GCA_002189265	ST101
GCA_002189305.1_Klebsiella_pneumoniae_C12_E8_15_Contig	GCA_002189305	ST101
GCA_002189335.1_Klebsiella_pneumoniae_C7_E3_14_Contig	GCA_002189335	ST101
GCA_002235835.1_Klebsiella_pneumoniae_27_Contig	GCA_002235835	ST101
GCA_002246235.1_Klebsiella_pneumoniae_KPCRETH20_Contig	GCA_002246235	ST101
GCA_002246245.1_Klebsiella_pneumoniae_KPCRETH18_Contig	GCA_002246245	ST101
GCA_002246635.1_Klebsiella_pneumoniae_KPCRETH19_Contig	GCA_002246635	ST101
GCA_002247645.1_Klebsiella_pneumoniae_KPSW_02_Contig	GCA_002247645	ST101
GCA_002248525.1_Klebsiella_pneumoniae_KPPUTH07_Contig	GCA_002248525	ST101
GCA_002411715.1_Klebsiella_pneumoniae_183_Contig	GCA_002411715	ST101
GCA_002417245.1_Klebsiella_pneumoniae_ST_101_K085_Contig	GCA_002417245	ST101
GCA_002851345.1_Klebsiella_pneumoniae_COL_Kpn43_Contig	GCA_002851345	ST101
GCA_002854355.1_Klebsiella_pneumoniae_COL_Kpn80_Contig	GCA_002854355	ST101
GCA_002854695.1_Klebsiella_pneumoniae_COL_Kpn51_Contig	GCA_002854695	ST101
GCA_002854715.1_Klebsiella_pneumoniae_COL_Kpn55_Contig	GCA_002854715	ST101
GCA_002854955.1_Klebsiella_pneumoniae_COL_Kpn97_Contig	GCA_002854955	ST101
GCA_002855315.1_Klebsiella_pneumoniae_COL_Kpn56_Contig	GCA_002855315	ST101
GCA_000735285.1_Klebsiella_pneumoniae_IA565_Contig	GCA_000735285	ST105
GCA_002248635.1_Klebsiella_pneumoniae_KPPSTH05_Contig	GCA_002248635	ST105
GCA_002775455.1_Klebsiella_pneumoniae_AUH_KIMP223_Contig	GCA_002775455	ST105
GCA_002853595.1_Klebsiella_pneumoniae_COL_Kpn131_Contig	GCA_002853595	ST105
GCA_002261585.1_Klebsiella_pneumoniae_L86_Contig	GCA_002261585	ST107
GCA_002775375.1_Klebsiella_pneumoniae_AUH_KIMP204_Contig	GCA_002775375	ST107
GCA_002856075.1_Klebsiella_pneumoniae_C23_Scaffold	GCA_002856075	ST107
GCA_002857065.1_Klebsiella_pneumoniae_D34_Scaffold	GCA_002857065	ST107
GCA_000240185.2_Klebsiella_pneumoniae_HS11286_Complete_Genome	GCA_000240185	ST11
GCA_000349285.2_Klebsiella_pneumoniae_ATCC_BAA_2146_Contig	GCA_000349285	ST11
GCA_000364385.3_Klebsiella_pneumoniae_ATCC_BAA_2146_Complete_Genome	GCA_000364385	ST11
GCA_000445405.1_Klebsiella_pneumoniae_JM45_Complete_Genome	GCA_000445405	ST11
GCA_000529325.1_Klebsiella_pneumoniae_IS33_Contig	GCA_000529325	ST11
GCA_000722485.1_Klebsiella_pneumoniae_KP_ST11_OXA48_Contig	GCA_000722485	ST11
GCA_000826605.1_Klebsiella_pneumoniae_KPM_nasey_Contig	GCA_000826605	ST11
GCA_001022035.1_Klebsiella_pneumoniae_CAV1392_Complete_Genome	GCA_001022035	ST11
GCA_001462735.1_Klebsiella_pneumoniae_K66_45_Contig	GCA_001462735	ST11
GCA_001462965.1_Klebsiella_pneumoniae_50625602_Contig	GCA_001462965	ST11
GCA_001463605.1_Klebsiella_pneumoniae_50806829_Contig	GCA_001463605	ST11
GCA_001548535.1_Klebsiella_pneumoniae_YMC_2013_7_B3993_Contig	GCA_001548535	ST11
GCA_001613585.1_Klebsiella_pneumoniae_TRqt_37_Scaffold	GCA_001613585	ST11
GCA_001613645.1_Klebsiella_pneumoniae_TRqt_49_Scaffold	GCA_001613645	ST11
GCA_001701495.1_Klebsiella_pneumoniae_17_GR_14_Contig	GCA_001701495	ST11
GCA_001701835.1_Klebsiella_pneumoniae_16_GR_13_Contig	GCA_001701835	ST11
GCA_001701895.1_Klebsiella_pneumoniae_12_BR_13_Contig	GCA_001701895	ST11
GCA_001720755.1_Klebsiella_pneumoniae_CFSAN044570_Contig	GCA_001720755	ST11
GCA_001720765.1_Klebsiella_pneumoniae_CFSAN044571_Contig	GCA_001720765	ST11
GCA_001720865.1_Klebsiella_pneumoniae_CFSAN044563_Contig	GCA_001720865	ST11
GCA_001758505.1_Klebsiella_pneumoniae_B20143_Scaffold	GCA_001758505	ST11
GCA_001856585.1_Klebsiella_pneumoniae_kp10_Scaffold	GCA_001856585	ST11
GCA_001856605.1_Klebsiella_pneumoniae_KP6_Scaffold	GCA_001856605	ST11
GCA_001866785.1_Klebsiella_pneumoniae_KP41_Scaffold	GCA_001866785	ST11
GCA_001879395.1_Klebsiella_pneumoniae_PM1842_Scaffold	GCA_001879395	ST11
GCA_001879405.1_Klebsiella_pneumoniae_PM565_Scaffold	GCA_001879405	ST11
GCA_001879415.1_Klebsiella_pneumoniae_PM138_Scaffold	GCA_001879415	ST11
GCA_001901855.1_Klebsiella_pneumoniae_YMC2011_11_B7578_Contig	GCA_001901855	ST11
GCA_001902415.1_Klebsiella_pneumoniae_Kp_Goe_822917_Complete_Genome	GCA_001902415	ST11
GCA_001902475.1_Klebsiella_pneumoniae_SWU01_Complete_Genome	GCA_001902475	ST11
GCA_001902755.3_Klebsiella_pneumoniae_1287_2164_Contig	GCA_001902755	ST11
GCA_001902775.3_Klebsiella_pneumoniae_1194_2067_Contig	GCA_001902775	ST11
GCA_001902955.3_Klebsiella_pneumoniae_1437_2342_Contig	GCA_001902955	ST11
GCA_001903035.3_Klebsiella_pneumoniae_1280_2158_Contig	GCA_001903035	ST11
GCA_001903335.3_Klebsiella_pneumoniae_1430_2335_Contig	GCA_001903335	ST11
GCA_001903975.3_Klebsiella_pneumoniae_1146_2028_Contig	GCA_001903975	ST11
GCA_001904405.3_Klebsiella_pneumoniae_1075_1947_Contig	GCA_001904405	ST11
GCA_001904475.3_Klebsiella_pneumoniae_1531_2471_Contig	GCA_001904475	ST11
GCA_001908895.1_Klebsiella_pneumoniae_Kp_Goe_821588_Complete_Genome	GCA_001908895	ST11
GCA_001922465.1_Klebsiella_pneumoniae_AR_0049_Complete_Genome	GCA_001922465	ST11
GCA_001939845.1_Klebsiella_pneumoniae_XL_1_Scaffold	GCA_001939845	ST11
GCA_002009075.1_Klebsiella_pneumoniae_KP38731_Complete_Genome	GCA_002009075	ST11
GCA_002104215.1_Klebsiella_pneumoniae_4182_Contig	GCA_002104215	ST11
GCA_002104315.1_Klebsiella_pneumoniae_1799_Contig	GCA_002104315	ST11
GCA_002104355.1_Klebsiella_pneumoniae_1787_Contig	GCA_002104355	ST11
GCA_002180175.1_Klebsiella_pneumoniae_AR_0146_Complete_Genome	GCA_002180175	ST11
GCA_002185355.1_Klebsiella_pneumoniae_ARLG_2949_Contig	GCA_002185355	ST11
GCA_002185405.1_Klebsiella_pneumoniae_ARLG_2850_Contig	GCA_002185405	ST11
GCA_002185965.1_Klebsiella_pneumoniae_ARLG_2847_Contig	GCA_002185965	ST11
GCA_002186205.1_Klebsiella_pneumoniae_ARLG_2464_Contig	GCA_002186205	ST11
GCA_002189415.1_Klebsiella_pneumoniae_C14_E10_16_Contig	GCA_002189415	ST11
GCA_002202255.1_Klebsiella_pneumoniae_AR_0148_Complete_Genome	GCA_002202255	ST11
GCA_002209465.1_Klebsiella_pneumoniae_KPC40_Contig	GCA_002209465	ST11
GCA_002234895.1_Klebsiella_pneumoniae_KP1099_Contig	GCA_002234895	ST11
GCA_002248435.1_Klebsiella_pneumoniae_KPPUTH03_Contig	GCA_002248435	ST11
GCA_002248545.1_Klebsiella_pneumoniae_KPPSTH01_Contig	GCA_002248545	ST11
GCA_002250985.1_Klebsiella_pneumoniae_D3_2b_17_Scaffold	GCA_002250985	ST11
GCA_002261575.1_Klebsiella_pneumoniae_L84_Contig	GCA_002261575	ST11
GCA_002261625.1_Klebsiella_pneumoniae_L9_Contig	GCA_002261625	ST11
GCA_002261685.1_Klebsiella_pneumoniae_L8_Contig	GCA_002261685	ST11
GCA_002261735.1_Klebsiella_pneumoniae_L61_Contig	GCA_002261735	ST11
GCA_002261745.1_Klebsiella_pneumoniae_L60_Contig	GCA_002261745	ST11
GCA_002261825.1_Klebsiella_pneumoniae_L531_Contig	GCA_002261825	ST11
GCA_002261875.1_Klebsiella_pneumoniae_L529_Contig	GCA_002261875	ST11
GCA_002261935.1_Klebsiella_pneumoniae_L526_Contig	GCA_002261935	ST11
GCA_002261945.1_Klebsiella_pneumoniae_L519_Contig	GCA_002261945	ST11
GCA_002261975.1_Klebsiella_pneumoniae_L513_Contig	GCA_002261975	ST11
GCA_002261985.1_Klebsiella_pneumoniae_L505_Contig	GCA_002261985	ST11
GCA_002262035.1_Klebsiella_pneumoniae_L511_Contig	GCA_002262035	ST11
GCA_002262055.1_Klebsiella_pneumoniae_L48_Contig	GCA_002262055	ST11
GCA_002262065.1_Klebsiella_pneumoniae_L482_Contig	GCA_002262065	ST11
GCA_002262075.1_Klebsiella_pneumoniae_L491_Contig	GCA_002262075	ST11
GCA_002262115.1_Klebsiella_pneumoniae_L50_Contig	GCA_002262115	ST11
GCA_002262135.1_Klebsiella_pneumoniae_L451_Contig	GCA_002262135	ST11
GCA_002262145.1_Klebsiella_pneumoniae_L447_Contig	GCA_002262145	ST11
GCA_002262185.1_Klebsiella_pneumoniae_L462_Contig	GCA_002262185	ST11
GCA_002262215.1_Klebsiella_pneumoniae_L400_Contig	GCA_002262215	ST11
GCA_002262225.1_Klebsiella_pneumoniae_L388_Contig	GCA_002262225	ST11
GCA_002262235.1_Klebsiella_pneumoniae_L39_Contig	GCA_002262235	ST11
GCA_002262275.1_Klebsiella_pneumoniae_L440_Contig	GCA_002262275	ST11
GCA_002262295.1_Klebsiella_pneumoniae_L38_Contig	GCA_002262295	ST11
GCA_002262305.1_Klebsiella_pneumoniae_L384_Contig	GCA_002262305	ST11
GCA_002262345.1_Klebsiella_pneumoniae_L386_Contig	GCA_002262345	ST11
GCA_002262375.1_Klebsiella_pneumoniae_L31_Contig	GCA_002262375	ST11
GCA_002262385.1_Klebsiella_pneumoniae_L36_Contig	GCA_002262385	ST11
GCA_002262415.1_Klebsiella_pneumoniae_L37_Contig	GCA_002262415	ST11
GCA_002262425.1_Klebsiella_pneumoniae_L350_Contig	GCA_002262425	ST11
GCA_002262455.1_Klebsiella_pneumoniae_L26_Contig	GCA_002262455	ST11
GCA_002262465.1_Klebsiella_pneumoniae_L299_Contig	GCA_002262465	ST11
GCA_002262475.1_Klebsiella_pneumoniae_L256_Contig	GCA_002262475	ST11
GCA_002262485.1_Klebsiella_pneumoniae_L30_Contig	GCA_002262485	ST11
GCA_002262535.1_Klebsiella_pneumoniae_L223_Contig	GCA_002262535	ST11
GCA_002262545.1_Klebsiella_pneumoniae_L211_Contig	GCA_002262545	ST11
GCA_002262555.1_Klebsiella_pneumoniae_L222_Contig	GCA_002262555	ST11
GCA_002262565.1_Klebsiella_pneumoniae_L23_Contig	GCA_002262565	ST11
GCA_002262615.1_Klebsiella_pneumoniae_L182_Contig	GCA_002262615	ST11
GCA_002262625.1_Klebsiella_pneumoniae_L20_Contig	GCA_002262625	ST11
GCA_002262635.1_Klebsiella_pneumoniae_L196_Contig	GCA_002262635	ST11
GCA_002262675.1_Klebsiella_pneumoniae_L201_Contig	GCA_002262675	ST11
GCA_002262705.1_Klebsiella_pneumoniae_L136_Contig	GCA_002262705	ST11
GCA_002262735.1_Klebsiella_pneumoniae_L176_Contig	GCA_002262735	ST11
GCA_002262745.1_Klebsiella_pneumoniae_L142_Contig	GCA_002262745	ST11
GCA_002262775.1_Klebsiella_pneumoniae_L124_Contig	GCA_002262775	ST11
GCA_002262795.1_Klebsiella_pneumoniae_L123_Contig	GCA_002262795	ST11
GCA_002262805.1_Klebsiella_pneumoniae_L122_Contig	GCA_002262805	ST11
GCA_002262855.1_Klebsiella_pneumoniae_L117_Contig	GCA_002262855	ST11
GCA_002264245.1_Klebsiella_pneumoniae_K4314_Contig	GCA_002264245	ST11
GCA_002264265.1_Klebsiella_pneumoniae_K4324_Contig	GCA_002264265	ST11
GCA_002264365.1_Klebsiella_pneumoniae_K4307_Contig	GCA_002264365	ST11
GCA_002264465.1_Klebsiella_pneumoniae_K2701_Contig	GCA_002264465	ST11
GCA_002264475.1_Klebsiella_pneumoniae_K4280_Contig	GCA_002264475	ST11
GCA_002264505.1_Klebsiella_pneumoniae_K3194_Contig	GCA_002264505	ST11
GCA_002264525.1_Klebsiella_pneumoniae_K2080_Contig	GCA_002264525	ST11
GCA_002264545.1_Klebsiella_pneumoniae_K1177_Contig	GCA_002264545	ST11
GCA_002264605.1_Klebsiella_pneumoniae_K2646_Contig	GCA_002264605	ST11
GCA_002264645.1_Klebsiella_pneumoniae_K3902_Contig	GCA_002264645	ST11
GCA_002264685.1_Klebsiella_pneumoniae_K3862_Contig	GCA_002264685	ST11
GCA_002264695.1_Klebsiella_pneumoniae_K5014_Contig	GCA_002264695	ST11
GCA_002264705.1_Klebsiella_pneumoniae_K3893_Contig	GCA_002264705	ST11
GCA_002264715.1_Klebsiella_pneumoniae_K3871_Contig	GCA_002264715	ST11
GCA_002264765.1_Klebsiella_pneumoniae_K1433_Contig	GCA_002264765	ST11
GCA_002264775.1_Klebsiella_pneumoniae_K5012_Contig	GCA_002264775	ST11
GCA_002264785.1_Klebsiella_pneumoniae_K3175_Contig	GCA_002264785	ST11
GCA_002264795.1_Klebsiella_pneumoniae_K4803_Contig	GCA_002264795	ST11
GCA_002264855.1_Klebsiella_pneumoniae_K2147_Contig	GCA_002264855	ST11
GCA_002264925.1_Klebsiella_pneumoniae_K85_Contig	GCA_002264925	ST11
GCA_002265015.1_Klebsiella_pneumoniae_K3657_Contig	GCA_002265015	ST11
GCA_002269295.1_Klebsiella_pneumoniae_911021_Complete_Genome	GCA_002269295	ST11
GCA_002278055.1_Klebsiella_pneumoniae_721005_Complete_Genome	GCA_002278055	ST11
GCA_002295145.1_Klebsiella_pneumoniae_B04_Scaffold	GCA_002295145	ST11
GCA_002295185.1_Klebsiella_pneumoniae_KPC05_Scaffold	GCA_002295185	ST11
GCA_002300725.1_Klebsiella_pneumoniae_B11_Scaffold	GCA_002300725	ST11
GCA_002300765.1_Klebsiella_pneumoniae_B35_Scaffold	GCA_002300765	ST11
GCA_002369865.1_Klebsiella_pneumoniae_SH1_Contig	GCA_002369865	ST11
GCA_002369985.1_Klebsiella_pneumoniae_3_Contig	GCA_002369985	ST11
GCA_002370005.1_Klebsiella_pneumoniae_5_Contig	GCA_002370005	ST11
GCA_002529065.1_Klebsiella_pneumoniae_IBL24_Contig	GCA_002529065	ST11
GCA_002529075.1_Klebsiella_pneumoniae_KP488_Contig	GCA_002529075	ST11
GCA_002587165.1_Klebsiella_pneumoniae_FDAARGOS_444_Complete_Genome	GCA_002587165	ST11
GCA_002610945.1_Klebsiella_pneumoniae_TR221_Scaffold	GCA_002610945	ST11
GCA_002636515.1_Klebsiella_pneumoniae_FDAARGOS_443_Chromosome	GCA_002636515	ST11
GCA_002751155.1_Klebsiella_pneumoniae_A1763_Contig	GCA_002751155	ST11
GCA_002751325.1_Klebsiella_pneumoniae_TR231_m_Scaffold	GCA_002751325	ST11
GCA_002751355.1_Klebsiella_pneumoniae_TRqt_43_Scaffold	GCA_002751355	ST11
GCA_002751415.1_Klebsiella_pneumoniae_TRqt_47_Scaffold	GCA_002751415	ST11
GCA_002751425.1_Klebsiella_pneumoniae_TRqt_38_Scaffold	GCA_002751425	ST11
GCA_002751435.1_Klebsiella_pneumoniae_TRqt_48_Scaffold	GCA_002751435	ST11
GCA_002751485.1_Klebsiella_pneumoniae_TRqt_44_Scaffold	GCA_002751485	ST11
GCA_002751755.1_Klebsiella_pneumoniae_A1771_Scaffold	GCA_002751755	ST11
GCA_002751785.1_Klebsiella_pneumoniae_A1760_Scaffold	GCA_002751785	ST11
GCA_002759035.1_Klebsiella_pneumoniae_LKP723703_1_Scaffold	GCA_002759035	ST11
GCA_002775405.1_Klebsiella_pneumoniae_AUH_KIMP217_Contig	GCA_002775405	ST11
GCA_002838125.1_Klebsiella_pneumoniae_KP05_2017_Contig	GCA_002838125	ST11
GCA_002845135.1_Klebsiella_pneumoniae_GD_KPC30_Scaffold	GCA_002845135	ST11
GCA_002848545.1_Klebsiella_pneumoniae_KP69_Complete_Genome	GCA_002848545	ST11
GCA_002848565.1_Klebsiella_pneumoniae_JS187_Complete_Genome	GCA_002848565	ST11
GCA_002848585.1_Klebsiella_pneumoniae_F44_Complete_Genome	GCA_002848585	ST11
GCA_002850635.1_Klebsiella_pneumoniae_WCHKP015148_Contig	GCA_002850635	ST11
GCA_002851375.1_Klebsiella_pneumoniae_COL_Kpn38_Contig	GCA_002851375	ST11
GCA_000982205.1_Klebsiella_pneumoniae_MRSN_3852_Contig	GCA_000982205	ST111
GCA_001482345.1_Klebsiella_pneumoniae_J1_Complete_Genome	GCA_001482345	ST111
GCA_001945475.1_Klebsiella_pneumoniae_97_58_Contig	GCA_001945475	ST111
GCA_002775235.1_Klebsiella_pneumoniae_AUH_KIMP184_Contig	GCA_002775235	ST111
GCA_000699425.1_Klebsiella_pneumoniae_7699_Contig	GCA_000699425	ST1123
GCA_002202275.1_Klebsiella_pneumoniae_AR_0107_Complete_Genome	GCA_002202275	ST1161
GCA_000820445.1_Klebsiella_pneumoniae_Contig	GCA_000820445	ST12
GCA_002187055.1_Klebsiella_pneumoniae_G4749_Contig	GCA_002187055	ST12
GCA_002187065.1_Klebsiella_pneumoniae_G4747_Contig	GCA_002187065	ST12
GCA_002187095.1_Klebsiella_pneumoniae_G4731_Contig	GCA_002187095	ST12
GCA_002187135.1_Klebsiella_pneumoniae_G4717_Contig	GCA_002187135	ST12
GCA_002850835.1_Klebsiella_pneumoniae_COL_Kpn47_Contig	GCA_002850835	ST12
GCA_002855155.1_Klebsiella_pneumoniae_COL_Kpn76_Contig	GCA_002855155	ST12
GCA_000409715.1_Klebsiella_pneumoniae_ATCC_25955_Contig	GCA_000409715	ST1271
GCA_000409735.1_Klebsiella_pneumoniae_G5_2_Contig	GCA_000409735	ST1271
GCA_002851475.1_Klebsiella_pneumoniae_COL_Kpn25_Contig	GCA_002851475	ST1271
GCA_001483045.1_Klebsiella_pneumoniae_OC511_Contig	GCA_001483045	ST13
GCA_002187545.1_Klebsiella_pneumoniae_BH3723_Contig	GCA_002187545	ST13
GCA_002530545.1_Klebsiella_pneumoniae_KpIMS38_Scaffold	GCA_002530545	ST13
GCA_002851195.1_Klebsiella_pneumoniae_COL_Kpn13_Contig	GCA_002851195	ST13
GCA_002854085.1_Klebsiella_pneumoniae_COL_Kpn108_Contig	GCA_002854085	ST13
GCA_002854915.1_Klebsiella_pneumoniae_COL_Kpn99_Contig	GCA_002854915	ST13
GCA_000733255.1_Klebsiella_pneumoniae_PittNDM01_Complete_Genome	GCA_000733255	ST14
GCA_001307175.1_Klebsiella_pneumoniae_KP617_Complete_Genome	GCA_001307175	ST14
GCA_001316865.2_Klebsiella_pneumoniae_ST14_944535499_Contig	GCA_001316865	ST14
GCA_001463165.1_Klebsiella_pneumoniae_U25_Chromosome	GCA_001463165	ST14
GCA_001463475.1_Klebsiella_pneumoniae_50884375_Contig	GCA_001463475	ST14
GCA_001521895.1_Klebsiella_pneumoniae_NUHL24835_Complete_Genome	GCA_001521895	ST14
GCA_001574505.1_Klebsiella_pneumoniae_U41_Scaffold	GCA_001574505	ST14
GCA_001709275.1_Klebsiella_pneumoniae_11_Complete_Genome	GCA_001709275	ST14
GCA_001709295.1_Klebsiella_pneumoniae_23_Complete_Genome	GCA_001709295	ST14
GCA_001720705.1_Klebsiella_pneumoniae_CFSAN044569_Contig	GCA_001720705	ST14
GCA_001720805.1_Klebsiella_pneumoniae_CFSAN044568_Contig	GCA_001720805	ST14
GCA_001720875.1_Klebsiella_pneumoniae_CFSAN044566_Contig	GCA_001720875	ST14
GCA_001742865.1_Klebsiella_pneumoniae_CMC_VB6753_Scaffold	GCA_001742865	ST14
GCA_001875535.1_Klebsiella_pneumoniae_CMC_VB13923_Scaffold	GCA_001875535	ST14
GCA_001879425.1_Klebsiella_pneumoniae_PM716_Scaffold	GCA_001879425	ST14
GCA_001891185.1_Klebsiella_pneumoniae_CMC_VB34444_Scaffold	GCA_001891185	ST14
GCA_001901585.1_Klebsiella_pneumoniae_B16470_Scaffold	GCA_001901585	ST14
GCA_002055855.1_Klebsiella_pneumoniae_AR_0068_Complete_Genome	GCA_002055855	ST14
GCA_002119955.1_Klebsiella_pneumoniae_KP024_Contig	GCA_002119955	ST14
GCA_002156785.1_Klebsiella_pneumoniae_KPN528_Complete_Genome	GCA_002156785	ST14
GCA_002180315.1_Klebsiella_pneumoniae_AR_0143_Complete_Genome	GCA_002180315	ST14
GCA_002186595.1_Klebsiella_pneumoniae_PO906_Contig	GCA_002186595	ST14
GCA_002187025.1_Klebsiella_pneumoniae_G749_Contig	GCA_002187025	ST14
GCA_002239715.1_Klebsiella_pneumoniae_CREC003_1_Contig	GCA_002239715	ST14
GCA_002246395.1_Klebsiella_pneumoniae_KPCRETH30_Contig	GCA_002246395	ST14
GCA_002246415.1_Klebsiella_pneumoniae_KPCRETH29_Contig	GCA_002246415	ST14
GCA_002246785.1_Klebsiella_pneumoniae_ECCRETH01_Contig	GCA_002246785	ST14
GCA_002246895.1_Klebsiella_pneumoniae_KPCRETH05_Contig	GCA_002246895	ST14
GCA_002271285.1_Klebsiella_pneumoniae_NU_CRE265_Contig	GCA_002271285	ST14
GCA_002510095.1_Klebsiella_pneumoniae_ST_14_K118_Contig	GCA_002510095	ST14
GCA_002776375.1_Klebsiella_pneumoniae_AUH_IMP216_Contig	GCA_002776375	ST14
GCA_002849465.1_Klebsiella_pneumoniae_BA1625_Scaffold	GCA_002849465	ST14
GCA_002850805.1_Klebsiella_pneumoniae_COL_Kpn41_Contig	GCA_002850805	ST14
GCA_002850885.1_Klebsiella_pneumoniae_COL_Kpn34_Contig	GCA_002850885	ST14
GCA_002850935.1_Klebsiella_pneumoniae_COL_Kpn33_Contig	GCA_002850935	ST14
GCA_002851435.1_Klebsiella_pneumoniae_COL_Kpn35_Contig	GCA_002851435	ST14
GCA_002851555.1_Klebsiella_pneumoniae_COL_Kpn21_Contig	GCA_002851555	ST14
GCA_002853975.1_Klebsiella_pneumoniae_COL_Kpn118_Contig	GCA_002853975	ST14
GCA_002854015.1_Klebsiella_pneumoniae_COL_Kpn110_Contig	GCA_002854015	ST14
GCA_002854575.1_Klebsiella_pneumoniae_COL_Kpn58_Contig	GCA_002854575	ST14
GCA_002855255.1_Klebsiella_pneumoniae_COL_Kpn62_Contig	GCA_002855255	ST14
GCA_002855295.1_Klebsiella_pneumoniae_COL_Kpn59_Contig	GCA_002855295	ST14
GCA_900205385.1_Klebsiella_pneumoniae_PV1BC_Contig	GCA_900205385	ST14
GCA_002416895.1_Klebsiella_pneumoniae_ST_1414_K058_Contig	GCA_002416895	ST1414
GCA_002417075.1_Klebsiella_pneumoniae_ST_1414_K078_Contig	GCA_002417075	ST1414
GCA_002417145.1_Klebsiella_pneumoniae_ST_1414_K141_Contig	GCA_002417145	ST1414
GCA_001457255.1_Klebsiella_pneumoniae_KPOI_1_Scaffold	GCA_001457255	ST1427
GCA_001457275.1_Klebsiella_pneumoniae_KPOI_1_3_Scaffold	GCA_001457275	ST1427
GCA_001457285.1_Klebsiella_pneumoniae_KPOI_1_4_Contig	GCA_001457285	ST1427
GCA_001457335.1_Klebsiella_pneumoniae_KPOI_2_Contig	GCA_001457335	ST1427
GCA_001460475.1_Klebsiella_pneumoniae_KPOI_5_Contig	GCA_001460475	ST1427
GCA_001460495.1_Klebsiella_pneumoniae_KPEI_2_Contig	GCA_001460495	ST1427
GCA_001460565.1_Klebsiella_pneumoniae_KPOI_3_Scaffold	GCA_001460565	ST1427
GCA_001460975.1_Klebsiella_pneumoniae_KPEI_1_Contig	GCA_001460975	ST1427
GCA_001460985.1_Klebsiella_pneumoniae_KPOI_4_Scaffold	GCA_001460985	ST1427
GCA_000763925.1_Klebsiella_pneumoniae_CDPH5262_Contig	GCA_000763925	ST147
GCA_000763935.1_Klebsiella_pneumoniae_CDPH3823_Contig	GCA_000763935	ST147
GCA_000822185.1_Klebsiella_pneumoniae_Contig	GCA_000822185	ST147
GCA_000822405.1_Klebsiella_pneumoniae_Contig	GCA_000822405	ST147
GCA_000822745.1_Klebsiella_pneumoniae_Contig	GCA_000822745	ST147
GCA_000822785.1_Klebsiella_pneumoniae_Contig	GCA_000822785	ST147
GCA_000956385.1_Klebsiella_pneumoniae_CDPH3707_Contig	GCA_000956385	ST147
GCA_000956395.1_Klebsiella_pneumoniae_CDPH3020_Contig	GCA_000956395	ST147
GCA_000958945.1_Klebsiella_pneumoniae_CDPH3823_Scaffold	GCA_000958945	ST147
GCA_000958955.1_Klebsiella_pneumoniae_CDPH3707_Contig	GCA_000958955	ST147
GCA_000958975.1_Klebsiella_pneumoniae_CDPH3020_Contig	GCA_000958975	ST147
GCA_001455995.1_Klebsiella_pneumoniae_MS6671_Complete_Genome	GCA_001455995	ST147
GCA_001462825.1_Klebsiella_pneumoniae_K68_18_Contig	GCA_001462825	ST147
GCA_001462845.1_Klebsiella_pneumoniae_K68_73_Contig	GCA_001462845	ST147
GCA_001463085.1_Klebsiella_pneumoniae_50580255_Contig	GCA_001463085	ST147
GCA_001511015.1_Klebsiella_pneumoniae_143500513_Contig	GCA_001511015	ST147
GCA_001648215.1_Klebsiella_pneumoniae_AATZP_Complete_Genome	GCA_001648215	ST147
GCA_001701425.1_Klebsiella_pneumoniae_1_GR_13_Contig	GCA_001701425	ST147
GCA_001721555.1_Klebsiella_pneumoniae_BA41763_Scaffold	GCA_001721555	ST147
GCA_001746535.1_Klebsiella_pneumoniae_TGH13_Complete_Genome	GCA_001746535	ST147
GCA_001855315.1_Klebsiella_pneumoniae_KP5_Complete_Genome	GCA_001855315	ST147
GCA_001875105.1_Klebsiella_pneumoniae_AR_0040_Contig	GCA_001875105	ST147
GCA_001885255.2_Klebsiella_pneumoniae_Kp_Goe_822579_Complete_Genome	GCA_001885255	ST147
GCA_001903685.3_Klebsiella_pneumoniae_1699_2677_Contig	GCA_001903685	ST147
GCA_001904245.3_Klebsiella_pneumoniae_1699_2676_Contig	GCA_001904245	ST147
GCA_001908595.1_Klebsiella_pneumoniae_Kp_Goe_149473_Complete_Genome	GCA_001908595	ST147
GCA_001908625.1_Klebsiella_pneumoniae_Kp_Goe_827024_Complete_Genome	GCA_001908625	ST147
GCA_001908655.1_Klebsiella_pneumoniae_Kp_Goe_827026_Complete_Genome	GCA_001908655	ST147
GCA_001908675.1_Klebsiella_pneumoniae_Kp_Goe_152021_Complete_Genome	GCA_001908675	ST147
GCA_001908695.1_Klebsiella_pneumoniae_KP_Goe_828304_Complete_Genome	GCA_001908695	ST147
GCA_001908875.1_Klebsiella_pneumoniae_Kp_Goe_149832_Complete_Genome	GCA_001908875	ST147
GCA_001956965.1_Klebsiella_pneumoniae_825795_1_Complete_Genome	GCA_001956965	ST147
GCA_002087215.1_Klebsiella_pneumoniae_KpvST147L_NDM_Contig	GCA_002087215	ST147
GCA_002108275.1_Klebsiella_pneumoniae_ARPG_318_Scaffold	GCA_002108275	ST147
GCA_002187575.1_Klebsiella_pneumoniae_CAB1442_Contig	GCA_002187575	ST147
GCA_002188145.1_Klebsiella_pneumoniae_CAB1458_Contig	GCA_002188145	ST147
GCA_002188245.1_Klebsiella_pneumoniae_AK_B_SD_011_Contig	GCA_002188245	ST147
GCA_002192375.1_Klebsiella_pneumoniae_AR_0138_Complete_Genome	GCA_002192375	ST147
GCA_002202215.1_Klebsiella_pneumoniae_AR_0145_Complete_Genome	GCA_002202215	ST147
GCA_002202235.1_Klebsiella_pneumoniae_AR_0152_Complete_Genome	GCA_002202235	ST147
GCA_002248485.1_Klebsiella_pneumoniae_KPPUTH04_Contig	GCA_002248485	ST147
GCA_002249195.1_Klebsiella_pneumoniae_KPPSTH08_Contig	GCA_002249195	ST147
GCA_002263345.1_Klebsiella_pneumoniae_SCPM_O_B_7954_KPB_417_16_Scaffold	GCA_002263345	ST147
GCA_002263375.1_Klebsiella_pneumoniae_SCPM_O_B_8045_KPB_1470_16_Scaffold	GCA_002263375	ST147
GCA_002406915.1_Klebsiella_pneumoniae_C16_Scaffold	GCA_002406915	ST147
GCA_002591075.1_Klebsiella_pneumoniae_FDAARGOS_439_Complete_Genome	GCA_002591075	ST147
GCA_002636375.1_Klebsiella_pneumoniae_FDAARGOS_442_Chromosome	GCA_002636375	ST147
GCA_002775175.1_Klebsiella_pneumoniae_AUH_KIMP209_Contig	GCA_002775175	ST147
GCA_002786755.1_Klebsiella_pneumoniae_CRKP_1215_Complete_Genome	GCA_002786755	ST147
GCA_002787755.1_Klebsiella_pneumoniae_CRKP_2297_Complete_Genome	GCA_002787755	ST147
GCA_002848605.1_Klebsiella_pneumoniae_002SK2_Complete_Genome	GCA_002848605	ST147
GCA_002849305.1_Klebsiella_pneumoniae_B2481_Scaffold	GCA_002849305	ST147
GCA_002854195.1_Klebsiella_pneumoniae_COL_Kpn95_Contig	GCA_002854195	ST147
GCA_002854515.1_Klebsiella_pneumoniae_COL_Kpn64_Contig	GCA_002854515	ST147
GCA_002866605.1_Klebsiella_pneumoniae_AUH_KIMP148_Contig	GCA_002866605	ST147
GCA_000409125.1_Klebsiella_pneumoniae_UHKPC57_Contig	GCA_000409125	ST15
GCA_000417465.1_Klebsiella_pneumoniae_UHKPC179_Contig	GCA_000417465	ST15
GCA_000474635.1_Klebsiella_pneumoniae_303K_Contig	GCA_000474635	ST15
GCA_000688155.1_Klebsiella_pneumoniae_MGH_63_Contig	GCA_000688155	ST15
GCA_000688215.1_Klebsiella_pneumoniae_MGH_75_Contig	GCA_000688215	ST15
GCA_000764615.1_Klebsiella_pneumoniae_PMK1_Complete_Genome	GCA_000764615	ST15
GCA_000821625.1_Klebsiella_pneumoniae_Contig	GCA_000821625	ST15
GCA_000821645.1_Klebsiella_pneumoniae_Contig	GCA_000821645	ST15
GCA_000823105.1_Klebsiella_pneumoniae_Contig	GCA_000823105	ST15
GCA_000943095.1_Klebsiella_pneumoniae_ST15_NDM_1_Scaffold	GCA_000943095	ST15
GCA_001596905.1_Klebsiella_pneumoniae_KPOII_4_Scaffold	GCA_001596905	ST15
GCA_001596925.1_Klebsiella_pneumoniae_KPOII_2_Scaffold	GCA_001596925	ST15
GCA_001596935.1_Klebsiella_pneumoniae_KPOII_1_Scaffold	GCA_001596935	ST15
GCA_001596985.1_Klebsiella_pneumoniae_KPOII_7_Scaffold	GCA_001596985	ST15
GCA_001596995.1_Klebsiella_pneumoniae_KPOII_10_Contig	GCA_001596995	ST15
GCA_001597015.1_Klebsiella_pneumoniae_KP_33P_Scaffold	GCA_001597015	ST15
GCA_001597095.1_Klebsiella_pneumoniae_KPOII_1_Scaffold	GCA_001597095	ST15
GCA_001597145.1_Klebsiella_pneumoniae_KPOII_8_Scaffold	GCA_001597145	ST15
GCA_001597195.1_Klebsiella_pneumoniae_KPEII_2_Contig	GCA_001597195	ST15
GCA_001597225.1_Klebsiella_pneumoniae_KPEII_3_Scaffold	GCA_001597225	ST15
GCA_001597245.1_Klebsiella_pneumoniae_KP_10_Contig	GCA_001597245	ST15
GCA_001653695.1_Klebsiella_pneumoniae_INSali390_Scaffold	GCA_001653695	ST15
GCA_001663195.1_Klebsiella_pneumoniae_BR_Complete_Genome	GCA_001663195	ST15
GCA_001750805.1_Klebsiella_pneumoniae_KP36_Complete_Genome	GCA_001750805	ST15
GCA_001902395.1_Klebsiella_pneumoniae_Kp_Goe_39795_Complete_Genome	GCA_001902395	ST15
GCA_001950675.1_Klebsiella_pneumoniae_MRY10_897_Contig	GCA_001950675	ST15
GCA_002186695.1_Klebsiella_pneumoniae_PO2673_Contig	GCA_002186695	ST15
GCA_002187335.1_Klebsiella_pneumoniae_G292_Contig	GCA_002187335	ST15
GCA_002188135.1_Klebsiella_pneumoniae_CAB1505_Contig	GCA_002188135	ST15
GCA_002205015.1_Klebsiella_pneumoniae_852K_Contig	GCA_002205015	ST15
GCA_002205025.1_Klebsiella_pneumoniae_852_Contig	GCA_002205025	ST15
GCA_002209405.1_Klebsiella_pneumoniae_19051_Complete_Genome	GCA_002209405	ST15
GCA_002211905.1_Klebsiella_pneumoniae_DHQP1605752_NV_Complete_Genome	GCA_002211905	ST15
GCA_002248595.1_Klebsiella_pneumoniae_KPPSTH04_Contig	GCA_002248595	ST15
GCA_002248955.1_Klebsiella_pneumoniae_KPCTRSRTH09_Contig	GCA_002248955	ST15
GCA_002249165.1_Klebsiella_pneumoniae_KPPUTH05_Contig	GCA_002249165	ST15
GCA_002264425.1_Klebsiella_pneumoniae_K4311_Contig	GCA_002264425	ST15
GCA_002416705.1_Klebsiella_pneumoniae_ST_15_E041_Contig	GCA_002416705	ST15
GCA_002417375.1_Klebsiella_pneumoniae_ST_15_K087_Contig	GCA_002417375	ST15
GCA_002417435.1_Klebsiella_pneumoniae_ST_15_K125_Contig	GCA_002417435	ST15
GCA_002417545.1_Klebsiella_pneumoniae_ST_15_K104_Contig	GCA_002417545	ST15
GCA_002775265.1_Klebsiella_pneumoniae_AUH_KIMP195_Contig	GCA_002775265	ST15
GCA_002775295.1_Klebsiella_pneumoniae_AUH_KIMP196_Contig	GCA_002775295	ST15
GCA_002775585.1_Klebsiella_pneumoniae_AUH_KIMP460_Contig	GCA_002775585	ST15
GCA_002776355.1_Klebsiella_pneumoniae_AUH_IMP459_Contig	GCA_002776355	ST15
GCA_002851015.1_Klebsiella_pneumoniae_COL_Kpn27_Contig	GCA_002851015	ST15
GCA_002854215.1_Klebsiella_pneumoniae_COL_Kpn94_Contig	GCA_002854215	ST15
GCA_002866645.1_Klebsiella_pneumoniae_AUH_KIMP158_Contig	GCA_002866645	ST15
GCA_002235765.1_Klebsiella_pneumoniae_33_Contig	GCA_002235765	ST1519
GCA_002411905.1_Klebsiella_pneumoniae_117_Contig	GCA_002411905	ST152
GCA_002416615.1_Klebsiella_pneumoniae_ST_152_K021_Contig	GCA_002416615	ST152
GCA_002416985.1_Klebsiella_pneumoniae_ST_152_KO25_Contig	GCA_002416985	ST152
GCA_002416995.1_Klebsiella_pneumoniae_ST_152_K031_Contig	GCA_002416995	ST152
GCA_002417015.1_Klebsiella_pneumoniae_ST_152_K051_Contig	GCA_002417015	ST152
GCA_002417165.1_Klebsiella_pneumoniae_ST_152_K071_Contig	GCA_002417165	ST152
GCA_002417175.1_Klebsiella_pneumoniae_ST_152_K181_Contig	GCA_002417175	ST152
GCA_002417395.1_Klebsiella_pneumoniae_ST_152_K110_Contig	GCA_002417395	ST152
GCA_002510145.1_Klebsiella_pneumoniae_ST_152_K131_Contig	GCA_002510145	ST152
GCA_002636215.1_Klebsiella_pneumoniae_FDAARGOS_447_Chromosome	GCA_002636215	ST152
GCA_002848835.1_Klebsiella_pneumoniae_BD_DM_413_Scaffold	GCA_002848835	ST152
GCA_002416655.1_Klebsiella_pneumoniae_ST_1552_K089_Contig	GCA_002416655	ST1552
GCA_002417105.1_Klebsiella_pneumoniae_ST_1552_K117_Contig	GCA_002417105	ST1552
GCA_002417305.1_Klebsiella_pneumoniae_ST_1552_K061_Contig	GCA_002417305	ST1552
GCA_002417325.1_Klebsiella_pneumoniae_ST_1552_K086_Contig	GCA_002417325	ST1552
GCA_002417385.1_Klebsiella_pneumoniae_ST_234_K080_Contig	GCA_002417385	ST1552
GCA_000821365.1_Klebsiella_pneumoniae_Contig	GCA_000821365	ST16
GCA_000822025.1_Klebsiella_pneumoniae_Contig	GCA_000822025	ST16
GCA_001482605.1_Klebsiella_pneumoniae_CPO_2015_0003_Scaffold	GCA_001482605	ST16
GCA_001721725.1_Klebsiella_pneumoniae_UCLAOXA232KP_Pt0_Complete_Genome	GCA_001721725	ST16
GCA_001741545.1_Klebsiella_pneumoniae_UCLAOXA232KP_Complete_Genome	GCA_001741545	ST16
GCA_001741665.1_Klebsiella_pneumoniae_UCLAOXA232KP_Complete_Genome	GCA_001741665	ST16
GCA_002180655.1_Klebsiella_pneumoniae_39887_Contig	GCA_002180655	ST16
GCA_002182045.1_Klebsiella_pneumoniae_42194_Contig	GCA_002182045	ST16
GCA_002184485.1_Klebsiella_pneumoniae_ARLG_2985_Contig	GCA_002184485	ST16
GCA_002186805.1_Klebsiella_pneumoniae_PO1805_Contig	GCA_002186805	ST16
GCA_002187805.1_Klebsiella_pneumoniae_PO1563_Contig	GCA_002187805	ST16
GCA_002239705.1_Klebsiella_pneumoniae_CREC014_1_Contig	GCA_002239705	ST16
GCA_002246035.1_Klebsiella_pneumoniae_KPCTRPRTH04_Contig	GCA_002246035	ST16
GCA_002246045.1_Klebsiella_pneumoniae_KPCTRPRTH05_Contig	GCA_002246045	ST16
GCA_002246275.1_Klebsiella_pneumoniae_KPCRETH22_Contig	GCA_002246275	ST16
GCA_002246285.1_Klebsiella_pneumoniae_KPCRETH23_Contig	GCA_002246285	ST16
GCA_002246315.1_Klebsiella_pneumoniae_KPCRETH25_Contig	GCA_002246315	ST16
GCA_002246325.1_Klebsiella_pneumoniae_KPCRETH24_Contig	GCA_002246325	ST16
GCA_002246365.1_Klebsiella_pneumoniae_KPCRETH28_Contig	GCA_002246365	ST16
GCA_002246555.1_Klebsiella_pneumoniae_KPCTRPRTH02_Contig	GCA_002246555	ST16
GCA_002246575.1_Klebsiella_pneumoniae_KPCRETH09_Contig	GCA_002246575	ST16
GCA_002246695.1_Klebsiella_pneumoniae_KPCRETH07_Contig	GCA_002246695	ST16
GCA_002246875.1_Klebsiella_pneumoniae_KPCTRPRTH01_Contig	GCA_002246875	ST16
GCA_002247365.1_Klebsiella_pneumoniae_KPCRETH11_Contig	GCA_002247365	ST16
GCA_002247375.1_Klebsiella_pneumoniae_KPCRETH12_Contig	GCA_002247375	ST16
GCA_002248505.1_Klebsiella_pneumoniae_KPPUTH08_Contig	GCA_002248505	ST16
GCA_002248625.1_Klebsiella_pneumoniae_KPCRETH13_Contig	GCA_002248625	ST16
GCA_002257775.1_Klebsiella_pneumoniae_WCHKP7J8_Scaffold	GCA_002257775	ST16
GCA_002635725.1_Klebsiella_pneumoniae_FDAARGOS_440_Chromosome	GCA_002635725	ST16
GCA_002775595.1_Klebsiella_pneumoniae_AUH_KIMP461_Contig	GCA_002775595	ST16
GCA_002866505.1_Klebsiella_pneumoniae_AUH_KIMP152_Contig	GCA_002866505	ST16
GCA_002866545.1_Klebsiella_pneumoniae_AUH_KIMP181_Contig	GCA_002866545	ST16
GCA_002866565.1_Klebsiella_pneumoniae_AUH_KIMP180_Contig	GCA_002866565	ST16
GCA_900092895.1_Klebsiella_pneumoniae_PB129_Scaffold	GCA_900092895	ST16
GCA_900093205.1_Klebsiella_pneumoniae_PB525_Contig	GCA_900093205	ST16
GCA_900093225.1_Klebsiella_pneumoniae_PB388_Contig	GCA_900093225	ST16
Sample 4743	-	ST1685
GCA_000567225.2_Klebsiella_pneumoniae_BIDMC_35_Contig	GCA_000567225	ST17
GCA_000688175.1_Klebsiella_pneumoniae_UCI_64_Contig	GCA_000688175	ST17
GCA_001463555.1_Klebsiella_pneumoniae_50690310_Contig	GCA_001463555	ST17
GCA_001463665.1_Klebsiella_pneumoniae_50825040_Contig	GCA_001463665	ST17
GCA_001698945.1_Klebsiella_pneumoniae_XH212_Contig	GCA_001698945	ST17
GCA_001699015.1_Klebsiella_pneumoniae_XH211_Contig	GCA_001699015	ST17
GCA_001699025.1_Klebsiella_pneumoniae_XH213_Contig	GCA_001699025	ST17
GCA_001699035.1_Klebsiella_pneumoniae_XH214_Contig	GCA_001699035	ST17
GCA_001699095.1_Klebsiella_pneumoniae_XH216_Contig	GCA_001699095	ST17
GCA_001699105.1_Klebsiella_pneumoniae_XH210_Contig	GCA_001699105	ST17
GCA_001875075.1_Klebsiella_pneumoniae_AR_0034_Contig	GCA_001875075	ST17
GCA_002180645.1_Klebsiella_pneumoniae_39879_Contig	GCA_002180645	ST17
GCA_002181895.1_Klebsiella_pneumoniae_44822_Contig	GCA_002181895	ST17
GCA_002181915.1_Klebsiella_pneumoniae_43419_Contig	GCA_002181915	ST17
GCA_002181945.1_Klebsiella_pneumoniae_44812_Contig	GCA_002181945	ST17
GCA_002181955.1_Klebsiella_pneumoniae_43421_Contig	GCA_002181955	ST17
GCA_002186625.1_Klebsiella_pneumoniae_PO613_Contig	GCA_002186625	ST17
GCA_002186665.1_Klebsiella_pneumoniae_MM_2436_Contig	GCA_002186665	ST17
GCA_002187145.1_Klebsiella_pneumoniae_G4712_Contig	GCA_002187145	ST17
GCA_002187245.1_Klebsiella_pneumoniae_G3704_Contig	GCA_002187245	ST17
GCA_002187685.1_Klebsiella_pneumoniae_AK_800_Contig	GCA_002187685	ST17
GCA_002248045.1_Klebsiella_pneumoniae_KPCTRSRTH02_Contig	GCA_002248045	ST17
GCA_002269905.1_Klebsiella_pneumoniae_A5_Contig	GCA_002269905	ST17
GCA_002269925.1_Klebsiella_pneumoniae_A2_Contig	GCA_002269925	ST17
GCA_002411885.1_Klebsiella_pneumoniae_76_Contig	GCA_002411885	ST17
GCA_002851455.1_Klebsiella_pneumoniae_COL_Kpn31_Contig	GCA_002851455	ST17
GCA_002853825.1_Klebsiella_pneumoniae_COL_Kpn122_Contig	GCA_002853825	ST17
GCA_002854675.1_Klebsiella_pneumoniae_COL_Kpn52_Contig	GCA_002854675	ST17
GCA_002855395.1_Klebsiella_pneumoniae_COL_Kpn53_Contig	GCA_002855395	ST17
GCA_900087895.1_Klebsiella_pneumoniae_KpMx1_Contig	GCA_900087895	ST17
GCA_002187395.1_Klebsiella_pneumoniae_G2275_Contig	GCA_002187395	ST1788
GCA_002188075.1_Klebsiella_pneumoniae_G186_Contig	GCA_002188075	ST1788
GCA_002866585.1_Klebsiella_pneumoniae_AUH_KIMP170_Contig	GCA_002866585	ST1799
GCA_002866675.1_Klebsiella_pneumoniae_AUH_KIMP177_Contig	GCA_002866675	ST1799
GCA_001907955.1_Klebsiella_pneumoniae_301_Contig	GCA_001907955	ST198
GCA_002157345.1_Klebsiella_pneumoniae_ICBKpBL_III_02_1_Contig	GCA_002157345	ST198
GCA_002241035.1_Klebsiella_pneumoniae_ICBKpBL_III_03_1_Contig	GCA_002241035	ST198
GCA_000773875.1_Klebsiella_pneumoniae_MRSN_1319_Contig	GCA_000773875	ST199
GCA_002855825.1_Klebsiella_pneumoniae_D62_Scaffold	GCA_002855825	ST199
GCA_002856945.1_Klebsiella_pneumoniae_D42_Scaffold	GCA_002856945	ST199
GCA_001038365.1_Klebsiella_pneumoniae_JS86C16_Contig	GCA_001038365	ST20
GCA_001902815.3_Klebsiella_pneumoniae_1205_2072_Contig	GCA_001902815	ST20
GCA_002186545.1_Klebsiella_pneumoniae_PO450_Contig	GCA_002186545	ST20
GCA_002853815.1_Klebsiella_pneumoniae_COL_Kpn121_Contig	GCA_002853815	ST20
GCA_002855175.1_Klebsiella_pneumoniae_COL_Kpn73_Contig	GCA_002855175	ST20
GCA_900172565.1_Klebsiella_pneumoniae_VRCO0077_Scaffold	GCA_900172565	ST20
GCA_900173015.1_Klebsiella_pneumoniae_VRES0974_Scaffold	GCA_900173015	ST2004
GCA_900173045.1_Klebsiella_pneumoniae_VRES0982_Scaffold	GCA_900173045	ST2004
GCA_900173065.1_Klebsiella_pneumoniae_VRES0979_Scaffold	GCA_900173065	ST2004
GCA_900175125.1_Klebsiella_pneumoniae_VRES0976_Scaffold	GCA_900175125	ST2004
GCA_001316765.2_Klebsiella_pneumoniae_ST2017_950118422_Contig	GCA_001316765	ST2017
GCA_001316925.2_Klebsiella_pneumoniae_ST2017_950117510_Contig	GCA_001316925	ST2017
GCA_001316945.3_Klebsiella_pneumoniae_ST2017_950142398_Chromosome	GCA_001316945	ST2017
GCA_002411675.1_Klebsiella_pneumoniae_20_Contig	GCA_002411675	ST2171
GCA_002211125.1_Klebsiella_pneumoniae_SCPM_O_B_7851_KPI_3014_Scaffold	GCA_002211125	ST2174
GCA_002854835.1_Klebsiella_pneumoniae_COL_Kpn102_Contig	GCA_002854835	ST22
GCA_000009885.1_Klebsiella_pneumoniae_NTUH_K2044_Complete_Genome	GCA_000009885	ST23
GCA_000294365.1_Klebsiella_pneumoniae_1084_Complete_Genome	GCA_000294365	ST23
GCA_001529935.1_Klebsiella_pneumoniae_RJF999_Complete_Genome	GCA_001529935	ST23
GCA_001708225.1_Klebsiella_pneumoniae_ED23_Complete_Genome	GCA_001708225	ST23
GCA_001708245.1_Klebsiella_pneumoniae_ED2_Complete_Genome	GCA_001708245	ST23
GCA_001720635.1_Klebsiella_pneumoniae_SCPM_O_B_7850_Contig	GCA_001720635	ST23
GCA_001721585.1_Klebsiella_pneumoniae_BA253_Scaffold	GCA_001721585	ST23
GCA_001756905.1_Klebsiella_pneumoniae_B3789_Scaffold	GCA_001756905	ST23
GCA_001939855.1_Klebsiella_pneumoniae_GN_3_Contig	GCA_001939855	ST23
GCA_002163895.1_Klebsiella_pneumoniae_RJA166_Complete_Genome	GCA_002163895	ST23
GCA_002173875.1_Klebsiella_pneumoniae_759_Contig	GCA_002173875	ST23
GCA_002206015.1_Klebsiella_pneumoniae_329_Contig	GCA_002206015	ST23
GCA_002210445.1_Klebsiella_pneumoniae_KpvST23L_OXA_48_Contig	GCA_002210445	ST23
GCA_002264195.1_Klebsiella_pneumoniae_K950_Contig	GCA_002264195	ST23
GCA_002264435.1_Klebsiella_pneumoniae_K5065_Contig	GCA_002264435	ST23
GCA_002369925.1_Klebsiella_pneumoniae_1088_Contig	GCA_002369925	ST23
GCA_002761315.1_Klebsiella_pneumoniae_P1428_Complete_Genome	GCA_002761315	ST23
GCA_002813595.1_Klebsiella_pneumoniae_SGH10_Complete_Genome	GCA_002813595	ST23
GCA_001758405.1_Klebsiella_pneumoniae_B1647_Scaffold	GCA_001758405	ST231
GCA_001870615.1_Klebsiella_pneumoniae_CMC_VB4175_Scaffold	GCA_001870615	ST231
GCA_001875525.1_Klebsiella_pneumoniae_CMC_VB35168_Scaffold	GCA_001875525	ST231
GCA_001875545.1_Klebsiella_pneumoniae_CMC_VB5505_Scaffold	GCA_001875545	ST231
GCA_001879315.1_Klebsiella_pneumoniae_PM1168_Scaffold	GCA_001879315	ST231
GCA_001879335.1_Klebsiella_pneumoniae_PM5186_Scaffold	GCA_001879335	ST231
GCA_001984895.1_Klebsiella_pneumoniae_KP41_2015_Contig	GCA_001984895	ST231
GCA_002119075.1_Klebsiella_pneumoniae_Kp76_Contig	GCA_002119075	ST231
GCA_002188185.1_Klebsiella_pneumoniae_BH2511_Contig	GCA_002188185	ST231
GCA_002237985.1_Klebsiella_pneumoniae_VD412_Contig	GCA_002237985	ST231
GCA_002239805.1_Klebsiella_pneumoniae_4REI026_2_Contig	GCA_002239805	ST231
GCA_002239815.1_Klebsiella_pneumoniae_CREI026_1_Contig	GCA_002239815	ST231
GCA_002246125.1_Klebsiella_pneumoniae_KPCRETH16_Contig	GCA_002246125	ST231
GCA_002246155.1_Klebsiella_pneumoniae_ECCRETH03_Contig	GCA_002246155	ST231
GCA_002246355.1_Klebsiella_pneumoniae_KPCRETH27_Contig	GCA_002246355	ST231
GCA_002246435.1_Klebsiella_pneumoniae_KPCRETH32_Contig	GCA_002246435	ST231
GCA_002246455.1_Klebsiella_pneumoniae_KPCRETH33_Contig	GCA_002246455	ST231
GCA_002246475.1_Klebsiella_pneumoniae_ECCRETH07_Contig	GCA_002246475	ST231
GCA_002246655.1_Klebsiella_pneumoniae_KPCRETH21_Contig	GCA_002246655	ST231
GCA_002246685.1_Klebsiella_pneumoniae_KPCRETH26_Contig	GCA_002246685	ST231
GCA_002246765.1_Klebsiella_pneumoniae_KPCTRPRTH03_Contig	GCA_002246765	ST231
GCA_002246845.1_Klebsiella_pneumoniae_KPCRETH14_Contig	GCA_002246845	ST231
GCA_002247385.1_Klebsiella_pneumoniae_KPCRETH15_Contig	GCA_002247385	ST231
GCA_002251895.1_Klebsiella_pneumoniae_KPCRETH31_Contig	GCA_002251895	ST231
GCA_002374295.1_Klebsiella_pneumoniae_C1_Scaffold	GCA_002374295	ST231
GCA_002383765.1_Klebsiella_pneumoniae_C3_Scaffold	GCA_002383765	ST231
GCA_002406545.1_Klebsiella_pneumoniae_C4_Scaffold	GCA_002406545	ST231
GCA_002406585.1_Klebsiella_pneumoniae_C5_Scaffold	GCA_002406585	ST231
GCA_002406605.1_Klebsiella_pneumoniae_C6_Scaffold	GCA_002406605	ST231
GCA_002406625.1_Klebsiella_pneumoniae_C8_Scaffold	GCA_002406625	ST231
GCA_002406945.1_Klebsiella_pneumoniae_C17_Scaffold	GCA_002406945	ST231
GCA_002406965.1_Klebsiella_pneumoniae_C18_Scaffold	GCA_002406965	ST231
GCA_002406975.1_Klebsiella_pneumoniae_C15_Scaffold	GCA_002406975	ST231
GCA_002406995.1_Klebsiella_pneumoniae_C22_Scaffold	GCA_002406995	ST231
GCA_002724125.1_Klebsiella_pneumoniae_VBA3720_Scaffold	GCA_002724125	ST231
GCA_002838145.1_Klebsiella_pneumoniae_Kp06_2017_Contig	GCA_002838145	ST231
GCA_002846055.1_Klebsiella_pneumoniae_C13_Scaffold	GCA_002846055	ST231
GCA_002849475.1_Klebsiella_pneumoniae_BA20567_Scaffold	GCA_002849475	ST231
GCA_900092965.1_Klebsiella_pneumoniae_PB395_Scaffold	GCA_900092965	ST231
GCA_000406525.1_Klebsiella_pneumoniae_UHKPC81_Contig	GCA_000406525	ST234
GCA_001066155.1_Klebsiella_pneumoniae_741_KPNE_Contig	GCA_001066155	ST234
GCA_001066165.1_Klebsiella_pneumoniae_743_KPNE_Contig	GCA_001066165	ST234
GCA_001066415.1_Klebsiella_pneumoniae_813_KPNE_Contig	GCA_001066415	ST234
GCA_001067135.1_Klebsiella_pneumoniae_755_rep1_KPNE_Scaffold	GCA_001067135	ST234
GCA_001067155.1_Klebsiella_pneumoniae_755_rep2_KPNE_Contig	GCA_001067155	ST234
GCA_002055765.1_Klebsiella_pneumoniae_AR_0117_Complete_Genome	GCA_002055765	ST234
GCA_002173825.1_Klebsiella_pneumoniae_402_Contig	GCA_002173825	ST25
GCA_002186705.1_Klebsiella_pneumoniae_PO379_Contig	GCA_002186705	ST25
GCA_002186945.1_Klebsiella_pneumoniae_PO1238_Contig	GCA_002186945	ST25
GCA_002187655.1_Klebsiella_pneumoniae_AK_905_Contig	GCA_002187655	ST25
GCA_002187715.1_Klebsiella_pneumoniae_AK_896_Contig	GCA_002187715	ST25
GCA_002188235.1_Klebsiella_pneumoniae_BH2308_Contig	GCA_002188235	ST25
GCA_002417255.1_Klebsiella_pneumoniae_ST_25_K161_Contig	GCA_002417255	ST25
GCA_000281255.1_Klebsiella_pneumoniae_KPNIH2_Contig	GCA_000281255	ST258
GCA_000281275.1_Klebsiella_pneumoniae_KPNIH5_Contig	GCA_000281275	ST258
GCA_000281295.1_Klebsiella_pneumoniae_KPNIH6_Contig	GCA_000281295	ST258
GCA_000281315.1_Klebsiella_pneumoniae_KPNIH9_Contig	GCA_000281315	ST258
GCA_000281335.1_Klebsiella_pneumoniae_KPNIH12_Contig	GCA_000281335	ST258
GCA_000281355.1_Klebsiella_pneumoniae_KPNIH17_Contig	GCA_000281355	ST258
GCA_000281375.1_Klebsiella_pneumoniae_KPNIH20_Contig	GCA_000281375	ST258
GCA_000281395.1_Klebsiella_pneumoniae_KPNIH4_Contig	GCA_000281395	ST258
GCA_000281415.1_Klebsiella_pneumoniae_KPNIH7_Contig	GCA_000281415	ST258
GCA_000281435.2_Klebsiella_pneumoniae_KPNIH10_Complete_Genome	GCA_000281435	ST258
GCA_000281455.1_Klebsiella_pneumoniae_KPNIH14_Contig	GCA_000281455	ST258
GCA_000281475.1_Klebsiella_pneumoniae_KPNIH18_Contig	GCA_000281475	ST258
GCA_000281495.1_Klebsiella_pneumoniae_KPNIH21_Contig	GCA_000281495	ST258
GCA_000281515.1_Klebsiella_pneumoniae_KPNIH22_Contig	GCA_000281515	ST258
GCA_000281535.2_Klebsiella_pneumoniae_KPNIH1_Complete_Genome	GCA_000281535	ST258
GCA_000281555.1_Klebsiella_pneumoniae_KPNIH8_Contig	GCA_000281555	ST258
GCA_000281575.1_Klebsiella_pneumoniae_KPNIH11_Contig	GCA_000281575	ST258
GCA_000281595.1_Klebsiella_pneumoniae_KPNIH16_Contig	GCA_000281595	ST258
GCA_000281615.1_Klebsiella_pneumoniae_KPNIH19_Contig	GCA_000281615	ST258
GCA_000281635.1_Klebsiella_pneumoniae_KPNIH23_Contig	GCA_000281635	ST258
GCA_000313365.1_Klebsiella_pneumoniae_ST258_K28BO_Contig	GCA_000313365	ST258
GCA_000316245.2_Klebsiella_pneumoniae_VA360_Contig	GCA_000316245	ST258
GCA_000349265.2_Klebsiella_pneumoniae_ATCC_BAA_1705_Contig	GCA_000349265	ST258
GCA_000367465.1_Klebsiella_pneumoniae_KpMDU1_Contig	GCA_000367465	ST258
GCA_000401195.1_Klebsiella_pneumoniae_UHKPC23_Contig	GCA_000401195	ST258
GCA_000406405.1_Klebsiella_pneumoniae_UHKPC40_Contig	GCA_000406405	ST258
GCA_000406425.1_Klebsiella_pneumoniae_UHKPC09_Contig	GCA_000406425	ST258
GCA_000406445.1_Klebsiella_pneumoniae_UHKPC01_Contig	GCA_000406445	ST258
GCA_000406465.1_Klebsiella_pneumoniae_UHKPC27_Contig	GCA_000406465	ST258
GCA_000406485.1_Klebsiella_pneumoniae_361_1301_Contig	GCA_000406485	ST258
GCA_000406545.1_Klebsiella_pneumoniae_VAKPC297_Contig	GCA_000406545	ST258
GCA_000406565.1_Klebsiella_pneumoniae_VAKPC280_Contig	GCA_000406565	ST258
GCA_000406585.1_Klebsiella_pneumoniae_VAKPC270_Contig	GCA_000406585	ST258
GCA_000406605.1_Klebsiella_pneumoniae_UHKPC24_Contig	GCA_000406605	ST258
GCA_000406625.1_Klebsiella_pneumoniae_VAKPC276_Contig	GCA_000406625	ST258
GCA_000406645.1_Klebsiella_pneumoniae_VAKPC309_Contig	GCA_000406645	ST258
GCA_000406665.1_Klebsiella_pneumoniae_UHKPC26_Contig	GCA_000406665	ST258
GCA_000406685.1_Klebsiella_pneumoniae_UHKPC22_Contig	GCA_000406685	ST258
GCA_000406705.1_Klebsiella_pneumoniae_UHKPC04_Contig	GCA_000406705	ST258
GCA_000406725.1_Klebsiella_pneumoniae_VAKPC252_Contig	GCA_000406725	ST258
GCA_000406745.1_Klebsiella_pneumoniae_440_1540_Contig	GCA_000406745	ST258
GCA_000406765.2_Klebsiella_pneumoniae_500_1420_Complete_Genome	GCA_000406765	ST258
GCA_000406825.1_Klebsiella_pneumoniae_VAKPC254_Contig	GCA_000406825	ST258
GCA_000406845.1_Klebsiella_pneumoniae_VAKPC269_Contig	GCA_000406845	ST258
GCA_000406865.1_Klebsiella_pneumoniae_540_1460_Contig	GCA_000406865	ST258
GCA_000406885.1_Klebsiella_pneumoniae_646_1568_Contig	GCA_000406885	ST258
GCA_000408965.1_Klebsiella_pneumoniae_UHKPC05_Contig	GCA_000408965	ST258
GCA_000408985.1_Klebsiella_pneumoniae_UHKPC_52_Contig	GCA_000408985	ST258
GCA_000409005.1_Klebsiella_pneumoniae_UHKPC45_Contig	GCA_000409005	ST258
GCA_000409025.1_Klebsiella_pneumoniae_VAKPC278_Contig	GCA_000409025	ST258
GCA_000409045.1_Klebsiella_pneumoniae_UHKPC29_Contig	GCA_000409045	ST258
GCA_000409065.1_Klebsiella_pneumoniae_DMC0526_Contig	GCA_000409065	ST258
GCA_000409085.1_Klebsiella_pneumoniae_UHKPC48_Contig	GCA_000409085	ST258
GCA_000409105.1_Klebsiella_pneumoniae_UHKPC32_Contig	GCA_000409105	ST258
GCA_000417045.1_Klebsiella_pneumoniae_UHKPC59_Contig	GCA_000417045	ST258
GCA_000417065.1_Klebsiella_pneumoniae_UHKPC61_Contig	GCA_000417065	ST258
GCA_000417085.2_Klebsiella_pneumoniae_UHKPC33_Complete_Genome	GCA_000417085	ST258
GCA_000417105.1_Klebsiella_pneumoniae_UHKPC28_Contig	GCA_000417105	ST258
GCA_000417125.1_Klebsiella_pneumoniae_UHKPC47_Contig	GCA_000417125	ST258
GCA_000417145.1_Klebsiella_pneumoniae_UHKPC02_Contig	GCA_000417145	ST258
GCA_000417165.1_Klebsiella_pneumoniae_UHKPC31_Contig	GCA_000417165	ST258
GCA_000417185.1_Klebsiella_pneumoniae_UHKPC06_Contig	GCA_000417185	ST258
GCA_000417205.1_Klebsiella_pneumoniae_DMC1316_Contig	GCA_000417205	ST258
GCA_000417225.2_Klebsiella_pneumoniae_DMC1097_Complete_Genome	GCA_000417225	ST258
GCA_000417245.1_Klebsiella_pneumoniae_UHKPC18_Contig	GCA_000417245	ST258
GCA_000417265.2_Klebsiella_pneumoniae_UHKPC07_Complete_Genome	GCA_000417265	ST258
GCA_000417305.1_Klebsiella_pneumoniae_UHKPC69_Contig	GCA_000417305	ST258
GCA_000417325.1_Klebsiella_pneumoniae_UHKPC77_Contig	GCA_000417325	ST258
GCA_000417345.1_Klebsiella_pneumoniae_UHKPC96_Contig	GCA_000417345	ST258
GCA_000417365.1_Klebsiella_pneumoniae_160_1080_Contig	GCA_000417365	ST258
GCA_000417385.1_Klebsiella_pneumoniae_120_1020_Contig	GCA_000417385	ST258
GCA_000417405.1_Klebsiella_pneumoniae_140_1040_Contig	GCA_000417405	ST258
GCA_000417425.1_Klebsiella_pneumoniae_280_1220_Contig	GCA_000417425	ST258
GCA_000417445.1_Klebsiella_pneumoniae_UHKPC67_Contig	GCA_000417445	ST258
GCA_000417545.1_Klebsiella_pneumoniae_UHKPC17_Contig	GCA_000417545	ST258
GCA_000439165.1_Klebsiella_pneumoniae_MP14_Contig	GCA_000439165	ST258
GCA_000439185.1_Klebsiella_pneumoniae_UKKV901664_Scaffold	GCA_000439185	ST258
GCA_000474865.1_Klebsiella_pneumoniae_BIDMC_18C_Contig	GCA_000474865	ST258
GCA_000474885.1_Klebsiella_pneumoniae_BIDMC_12C_Contig	GCA_000474885	ST258
GCA_000474905.1_Klebsiella_pneumoniae_BIDMC_16_Contig	GCA_000474905	ST258
GCA_000495875.1_Klebsiella_pneumoniae_KKBO_1_Scaffold	GCA_000495875	ST258
GCA_000567765.2_Klebsiella_pneumoniae_MGH_31_Contig	GCA_000567765	ST258
GCA_000597905.1_Klebsiella_pneumoniae_30684_NJST258_2_Complete_Genome	GCA_000597905	ST258
GCA_000598005.1_Klebsiella_pneumoniae_30660_NJST258_1_Complete_Genome	GCA_000598005	ST258
GCA_000599905.1_Klebsiella_pneumoniae_Kb677_Contig	GCA_000599905	ST258
GCA_000599925.1_Klebsiella_pneumoniae_Kb140_Contig	GCA_000599925	ST258
GCA_000633775.1_Klebsiella_pneumoniae_CHS_42_Scaffold	GCA_000633775	ST258
GCA_000688555.1_Klebsiella_pneumoniae_CHS_16_Contig	GCA_000688555	ST258
GCA_000688635.1_Klebsiella_pneumoniae_CHS_08_Contig	GCA_000688635	ST258
GCA_000694475.2_Klebsiella_pneumoniae_MGH_59_Contig	GCA_000694475	ST258
GCA_000709165.1_Klebsiella_pneumoniae_160_1080_Contig	GCA_000709165	ST258
GCA_000709185.1_Klebsiella_pneumoniae_VAKPC278_Contig	GCA_000709185	ST258
GCA_000709205.1_Klebsiella_pneumoniae_UHKPC45_Contig	GCA_000709205	ST258
GCA_000709225.1_Klebsiella_pneumoniae_UHKPC_52_Contig	GCA_000709225	ST258
GCA_000709245.1_Klebsiella_pneumoniae_UHKPC05_Contig	GCA_000709245	ST258
GCA_000714675.1_Klebsiella_pneumoniae_KPNIH24_Complete_Genome	GCA_000714675	ST258
GCA_000717515.1_Klebsiella_pneumoniae_KPR0928_Complete_Genome	GCA_000717515	ST258
GCA_000738865.1_Klebsiella_pneumoniae_MRSN8157_Scaffold	GCA_000738865	ST258
GCA_000738875.1_Klebsiella_pneumoniae_MRSN6920_Scaffold	GCA_000738875	ST258
GCA_000775375.1_Klebsiella_pneumoniae_KPNIH33_Complete_Genome	GCA_000775375	ST258
GCA_000775395.1_Klebsiella_pneumoniae_KPNIH32_Complete_Genome	GCA_000775395	ST258
GCA_000784985.1_Klebsiella_pneumoniae_KPNIH30_Complete_Genome	GCA_000784985	ST258
GCA_000788015.1_Klebsiella_pneumoniae_ATCC_13883_Scaffold	GCA_000788015	ST258
GCA_000807395.3_Klebsiella_pneumoniae_32192_Complete_Genome	GCA_000807395	ST258
GCA_000807475.2_Klebsiella_pneumoniae_38544_Contig	GCA_000807475	ST258
GCA_000807495.2_Klebsiella_pneumoniae_38547_Contig	GCA_000807495	ST258
GCA_000814305.1_Klebsiella_pneumoniae_34618_Complete_Genome	GCA_000814305	ST258
GCA_000821485.1_Klebsiella_pneumoniae_Contig	GCA_000821485	ST258
GCA_000821525.1_Klebsiella_pneumoniae_Contig	GCA_000821525	ST258
GCA_000821725.1_Klebsiella_pneumoniae_Contig	GCA_000821725	ST258
GCA_000821745.1_Klebsiella_pneumoniae_Contig	GCA_000821745	ST258
GCA_000822205.1_Klebsiella_pneumoniae_Contig	GCA_000822205	ST258
GCA_000822285.1_Klebsiella_pneumoniae_Contig	GCA_000822285	ST258
GCA_000822325.1_Klebsiella_pneumoniae_Contig	GCA_000822325	ST258
GCA_000822565.1_Klebsiella_pneumoniae_Contig	GCA_000822565	ST258
GCA_000822585.1_Klebsiella_pneumoniae_Contig	GCA_000822585	ST258
GCA_000822605.1_Klebsiella_pneumoniae_Contig	GCA_000822605	ST258
GCA_000822645.1_Klebsiella_pneumoniae_Contig	GCA_000822645	ST258
GCA_000982045.1_Klebsiella_pneumoniae_MRSN_6902_Contig	GCA_000982045	ST258
GCA_001008725.1_Klebsiella_pneumoniae_ST258_FL_Contig	GCA_001008725	ST258
GCA_001022235.1_Klebsiella_pneumoniae_CAV1596_Complete_Genome	GCA_001022235	ST258
GCA_001066115.1_Klebsiella_pneumoniae_733_KPNE_Contig	GCA_001066115	ST258
GCA_001182405.1_Klebsiella_pneumoniae_KpVA_2_Contig	GCA_001182405	ST258
GCA_001182425.1_Klebsiella_pneumoniae_KpVA_3_Contig	GCA_001182425	ST258
GCA_001182445.1_Klebsiella_pneumoniae_KpVA_4_Contig	GCA_001182445	ST258
GCA_001182465.1_Klebsiella_pneumoniae_KpVA_5_Contig	GCA_001182465	ST258
GCA_001182485.1_Klebsiella_pneumoniae_KpVA_6_Contig	GCA_001182485	ST258
GCA_001182505.1_Klebsiella_pneumoniae_KpVA_7_Contig	GCA_001182505	ST258
GCA_001275285.1_Klebsiella_pneumoniae_SY_A_Contig	GCA_001275285	ST258
GCA_001275295.1_Klebsiella_pneumoniae_SY_B_Contig	GCA_001275295	ST258
GCA_001275305.1_Klebsiella_pneumoniae_SY_B2_Contig	GCA_001275305	ST258
GCA_001462525.1_Klebsiella_pneumoniae_K48_58_Contig	GCA_001462525	ST258
GCA_001462545.1_Klebsiella_pneumoniae_K52_10_Contig	GCA_001462545	ST258
GCA_001462555.1_Klebsiella_pneumoniae_K47_25_Contig	GCA_001462555	ST258
GCA_001462605.1_Klebsiella_pneumoniae_K52_36_Contig	GCA_001462605	ST258
GCA_001462615.1_Klebsiella_pneumoniae_K52_43_Contig	GCA_001462615	ST258
GCA_001462645.1_Klebsiella_pneumoniae_K53_64_Contig	GCA_001462645	ST258
GCA_001462655.1_Klebsiella_pneumoniae_K52_74_Contig	GCA_001462655	ST258
GCA_001462685.1_Klebsiella_pneumoniae_K54_05_Contig	GCA_001462685	ST258
GCA_001462765.1_Klebsiella_pneumoniae_K66_62_Contig	GCA_001462765	ST258
GCA_001462785.1_Klebsiella_pneumoniae_K66_73_Contig	GCA_001462785	ST258
GCA_001462795.1_Klebsiella_pneumoniae_K67_17_Contig	GCA_001462795	ST258
GCA_001462865.1_Klebsiella_pneumoniae_50518740_Contig	GCA_001462865	ST258
GCA_001463055.1_Klebsiella_pneumoniae_50509588_Contig	GCA_001463055	ST258
GCA_001463285.1_Klebsiella_pneumoniae_50732159_Contig	GCA_001463285	ST258
GCA_001463415.1_Klebsiella_pneumoniae_50834782_Contig	GCA_001463415	ST258
GCA_001482995.1_Klebsiella_pneumoniae_OC217_Contig	GCA_001482995	ST258
GCA_001483005.1_Klebsiella_pneumoniae_Z3209_Contig	GCA_001483005	ST258
GCA_001483105.1_Klebsiella_pneumoniae_OC648_Contig	GCA_001483105	ST258
GCA_001510995.1_Klebsiella_pneumoniae_143500514_Contig	GCA_001510995	ST258
GCA_001511035.1_Klebsiella_pneumoniae_143500505_Scaffold	GCA_001511035	ST258
GCA_001511095.1_Klebsiella_pneumoniae_143500512_Scaffold	GCA_001511095	ST258
GCA_001511115.1_Klebsiella_pneumoniae_143500541_Scaffold	GCA_001511115	ST258
GCA_001511255.1_Klebsiella_pneumoniae_143500529_Contig	GCA_001511255	ST258
GCA_001511275.1_Klebsiella_pneumoniae_143500528_Scaffold	GCA_001511275	ST258
GCA_001511295.1_Klebsiella_pneumoniae_143500537_Scaffold	GCA_001511295	ST258
GCA_001511335.1_Klebsiella_pneumoniae_143500531_Contig	GCA_001511335	ST258
GCA_001511355.1_Klebsiella_pneumoniae_143500506_Scaffold	GCA_001511355	ST258
GCA_001511375.1_Klebsiella_pneumoniae_143500540_Contig	GCA_001511375	ST258
GCA_001511575.1_Klebsiella_pneumoniae_143500517_Scaffold	GCA_001511575	ST258
GCA_001511635.1_Klebsiella_pneumoniae_143500525_Scaffold	GCA_001511635	ST258
GCA_001511695.1_Klebsiella_pneumoniae_143500542_Scaffold	GCA_001511695	ST258
GCA_001511715.1_Klebsiella_pneumoniae_143500510_Contig	GCA_001511715	ST258
GCA_001511735.1_Klebsiella_pneumoniae_143500543_Scaffold	GCA_001511735	ST258
GCA_001517715.1_Klebsiella_pneumoniae_M098440_Contig	GCA_001517715	ST258
GCA_001517725.1_Klebsiella_pneumoniae_M098513_Scaffold	GCA_001517725	ST258
GCA_001517735.1_Klebsiella_pneumoniae_M097273_Contig	GCA_001517735	ST258
GCA_001517745.1_Klebsiella_pneumoniae_M098451_Scaffold	GCA_001517745	ST258
GCA_001517795.1_Klebsiella_pneumoniae_M098442_Contig	GCA_001517795	ST258
GCA_001517805.1_Klebsiella_pneumoniae_M104145_Scaffold	GCA_001517805	ST258
GCA_001517955.1_Klebsiella_pneumoniae_M098441_Scaffold	GCA_001517955	ST258
GCA_001666005.1_Klebsiella_pneumoniae_KPNIH40_Contig	GCA_001666005	ST258
GCA_001666015.1_Klebsiella_pneumoniae_KPNIH35_Contig	GCA_001666015	ST258
GCA_001667545.1_Klebsiella_pneumoniae_KPNIH37_Contig	GCA_001667545	ST258
GCA_001675125.1_Klebsiella_pneumoniae_KPNIH36_Complete_Genome	GCA_001675125	ST258
GCA_001695655.1_Klebsiella_pneumoniae_KPNIH34_Contig	GCA_001695655	ST258
GCA_001701355.1_Klebsiella_pneumoniae_19_GR_14_Contig	GCA_001701355	ST258
GCA_001701365.1_Klebsiella_pneumoniae_13_GR_14_Contig	GCA_001701365	ST258
GCA_001701395.1_Klebsiella_pneumoniae_22_GR_12_Contig	GCA_001701395	ST258
GCA_001701415.1_Klebsiella_pneumoniae_24_GR_13_Contig	GCA_001701415	ST258
GCA_001701445.1_Klebsiella_pneumoniae_7_GR_13_Contig	GCA_001701445	ST258
GCA_001701475.1_Klebsiella_pneumoniae_15_GR_13_Contig	GCA_001701475	ST258
GCA_001701505.1_Klebsiella_pneumoniae_8_GR_13_Contig	GCA_001701505	ST258
GCA_001701525.1_Klebsiella_pneumoniae_18_GR_14_Contig	GCA_001701525	ST258
GCA_001701555.1_Klebsiella_pneumoniae_23_GR_12_Contig	GCA_001701555	ST258
GCA_001701815.1_Klebsiella_pneumoniae_14_GR_Contig	GCA_001701815	ST258
GCA_001701845.1_Klebsiella_pneumoniae_20_GR_12_Contig	GCA_001701845	ST258
GCA_001701925.1_Klebsiella_pneumoniae_9_GR_12_Contig	GCA_001701925	ST258
GCA_001701975.1_Klebsiella_pneumoniae_10_GR_13_Contig	GCA_001701975	ST258
GCA_001702005.1_Klebsiella_pneumoniae_3_GR_13_Contig	GCA_001702005	ST258
GCA_001702035.1_Klebsiella_pneumoniae_4_GR_12_Contig	GCA_001702035	ST258
GCA_001702045.1_Klebsiella_pneumoniae_2_GR_12_Contig	GCA_001702045	ST258
GCA_001708165.1_Klebsiella_pneumoniae_KPACU35_Contig	GCA_001708165	ST258
GCA_001874725.1_Klebsiella_pneumoniae_AR_0012_Contig	GCA_001874725	ST258
GCA_001875025.1_Klebsiella_pneumoniae_AR_0003_Contig	GCA_001875025	ST258
GCA_001875045.2_Klebsiella_pneumoniae_AR_0004_Contig	GCA_001875045	ST258
GCA_001875055.2_Klebsiella_pneumoniae_AR_0005_Contig	GCA_001875055	ST258
GCA_001902195.1_Klebsiella_pneumoniae_MNCRE78_Complete_Genome	GCA_001902195	ST258
GCA_001902215.1_Klebsiella_pneumoniae_MNCRE69_Complete_Genome	GCA_001902215	ST258
GCA_001902235.1_Klebsiella_pneumoniae_MNCRE53_Complete_Genome	GCA_001902235	ST258
GCA_001902255.1_Klebsiella_pneumoniae_CAV1453_Complete_Genome	GCA_001902255	ST258
GCA_001902765.3_Klebsiella_pneumoniae_1187_2059_Contig	GCA_001902765	ST258
GCA_001902835.3_Klebsiella_pneumoniae_1521_2451_Contig	GCA_001902835	ST258
GCA_001902855.3_Klebsiella_pneumoniae_700_1644_Contig	GCA_001902855	ST258
GCA_001902875.3_Klebsiella_pneumoniae_1512_2440_Contig	GCA_001902875	ST258
GCA_001902905.3_Klebsiella_pneumoniae_440_1360_Contig	GCA_001902905	ST258
GCA_001902945.3_Klebsiella_pneumoniae_1473_2389_Contig	GCA_001902945	ST258
GCA_001902965.3_Klebsiella_pneumoniae_1225_2091_Contig	GCA_001902965	ST258
GCA_001903015.3_Klebsiella_pneumoniae_1260_2136_Contig	GCA_001903015	ST258
GCA_001903025.3_Klebsiella_pneumoniae_1254_2128_Contig	GCA_001903025	ST258
GCA_001903095.3_Klebsiella_pneumoniae_1295_2175_Contig	GCA_001903095	ST258
GCA_001903105.3_Klebsiella_pneumoniae_1316_2199_Contig	GCA_001903105	ST258
GCA_001903125.3_Klebsiella_pneumoniae_682_1613_Contig	GCA_001903125	ST258
GCA_001903135.3_Klebsiella_pneumoniae_1213_2078_Contig	GCA_001903135	ST258
GCA_001903175.3_Klebsiella_pneumoniae_671_1599_Contig	GCA_001903175	ST258
GCA_001903195.3_Klebsiella_pneumoniae_679_1608_Contig	GCA_001903195	ST258
GCA_001903205.3_Klebsiella_pneumoniae_1483_2404_Contig	GCA_001903205	ST258
GCA_001903215.3_Klebsiella_pneumoniae_686_1617_Contig	GCA_001903215	ST258
GCA_001903255.3_Klebsiella_pneumoniae_1486_2407_Contig	GCA_001903255	ST258
GCA_001903265.3_Klebsiella_pneumoniae_600_1500_Contig	GCA_001903265	ST258
GCA_001903285.3_Klebsiella_pneumoniae_660_1586_Contig	GCA_001903285	ST258
GCA_001903295.3_Klebsiella_pneumoniae_1398_2291_Contig	GCA_001903295	ST258
GCA_001903355.3_Klebsiella_pneumoniae_1416_2314_Contig	GCA_001903355	ST258
GCA_001903365.3_Klebsiella_pneumoniae_1345_2229_Contig	GCA_001903365	ST258
GCA_001903385.3_Klebsiella_pneumoniae_1423_2323_Contig	GCA_001903385	ST258
GCA_001903415.3_Klebsiella_pneumoniae_1378_2267_Contig	GCA_001903415	ST258
GCA_001903435.3_Klebsiella_pneumoniae_1293_2172_Contig	GCA_001903435	ST258
GCA_001903445.3_Klebsiella_pneumoniae_1315_2198_Contig	GCA_001903445	ST258
GCA_001903465.3_Klebsiella_pneumoniae_1239_2106_Contig	GCA_001903465	ST258
GCA_001903495.3_Klebsiella_pneumoniae_720_1668_Contig	GCA_001903495	ST258
GCA_001903515.3_Klebsiella_pneumoniae_1192_2063_Contig	GCA_001903515	ST258
GCA_001903525.3_Klebsiella_pneumoniae_1285_2163_Contig	GCA_001903525	ST258
GCA_001903535.3_Klebsiella_pneumoniae_909_1860_Contig	GCA_001903535	ST258
GCA_001903555.3_Klebsiella_pneumoniae_1497_2419_Contig	GCA_001903555	ST258
GCA_001903605.3_Klebsiella_pneumoniae_1166_2049_Contig	GCA_001903605	ST258
GCA_001903675.3_Klebsiella_pneumoniae_2060_3082_Contig	GCA_001903675	ST258
GCA_001903735.3_Klebsiella_pneumoniae_1560_2497_Contig	GCA_001903735	ST258
GCA_001903755.3_Klebsiella_pneumoniae_701_1645_Contig	GCA_001903755	ST258
GCA_001903775.3_Klebsiella_pneumoniae_729_1679_Contig	GCA_001903775	ST258
GCA_001903785.3_Klebsiella_pneumoniae_1524_2455_Contig	GCA_001903785	ST258
GCA_001903795.3_Klebsiella_pneumoniae_1586_2523_Contig	GCA_001903795	ST258
GCA_001903835.3_Klebsiella_pneumoniae_899_1848_Contig	GCA_001903835	ST258
GCA_001903845.3_Klebsiella_pneumoniae_776_1742_Contig	GCA_001903845	ST258
GCA_001903865.3_Klebsiella_pneumoniae_703_1648_Contig	GCA_001903865	ST258
GCA_001903875.3_Klebsiella_pneumoniae_2019_3069_Contig	GCA_001903875	ST258
GCA_001903915.3_Klebsiella_pneumoniae_2073_3097_Contig	GCA_001903915	ST258
GCA_001903925.3_Klebsiella_pneumoniae_1583_2520_Contig	GCA_001903925	ST258
GCA_001903935.3_Klebsiella_pneumoniae_2029_3040_Contig	GCA_001903935	ST258
GCA_001903995.3_Klebsiella_pneumoniae_1566_2504_Contig	GCA_001903995	ST258
GCA_001904005.3_Klebsiella_pneumoniae_2093_3123_Contig	GCA_001904005	ST258
GCA_001904045.3_Klebsiella_pneumoniae_761_1723_Contig	GCA_001904045	ST258
GCA_001904095.3_Klebsiella_pneumoniae_2063_3086_Contig	GCA_001904095	ST258
GCA_001904105.3_Klebsiella_pneumoniae_2049_3065_Contig	GCA_001904105	ST258
GCA_001904115.3_Klebsiella_pneumoniae_2022_3032_Contig	GCA_001904115	ST258
GCA_001904155.3_Klebsiella_pneumoniae_1523_2454_Contig	GCA_001904155	ST258
GCA_001904165.3_Klebsiella_pneumoniae_1538_2467_Contig	GCA_001904165	ST258
GCA_001904175.3_Klebsiella_pneumoniae_1544_2474_Contig	GCA_001904175	ST258
GCA_001904205.3_Klebsiella_pneumoniae_1557_2494_Contig	GCA_001904205	ST258
GCA_001904235.3_Klebsiella_pneumoniae_1573_2510_Contig	GCA_001904235	ST258
GCA_001904255.3_Klebsiella_pneumoniae_975_1913_Contig	GCA_001904255	ST258
GCA_001904295.3_Klebsiella_pneumoniae_2049_3064_Contig	GCA_001904295	ST258
GCA_001904315.3_Klebsiella_pneumoniae_2049_3066_Contig	GCA_001904315	ST258
GCA_001904325.3_Klebsiella_pneumoniae_1041_1933_Contig	GCA_001904325	ST258
GCA_001904335.3_Klebsiella_pneumoniae_1084_1957_Contig	GCA_001904335	ST258
GCA_001904375.3_Klebsiella_pneumoniae_1085_1956_Contig	GCA_001904375	ST258
GCA_001904385.3_Klebsiella_pneumoniae_977_1916_Contig	GCA_001904385	ST258
GCA_001904425.3_Klebsiella_pneumoniae_982_1922_Contig	GCA_001904425	ST258
GCA_001904455.3_Klebsiella_pneumoniae_935_1884_Contig	GCA_001904455	ST258
GCA_001904485.3_Klebsiella_pneumoniae_1562_2499_Contig	GCA_001904485	ST258
GCA_001904495.3_Klebsiella_pneumoniae_2073_3098_Contig	GCA_001904495	ST258
GCA_001904535.3_Klebsiella_pneumoniae_2030_3042_Contig	GCA_001904535	ST258
GCA_001905185.1_Klebsiella_pneumoniae_1438_2_A_Contig	GCA_001905185	ST258
GCA_001905195.1_Klebsiella_pneumoniae_1506_2_D_Contig	GCA_001905195	ST258
GCA_001905225.1_Klebsiella_pneumoniae_1520_3_B_Contig	GCA_001905225	ST258
GCA_001905235.1_Klebsiella_pneumoniae_1526_3_C_Contig	GCA_001905235	ST258
GCA_001905315.1_Klebsiella_pneumoniae_1439_3_A_Contig	GCA_001905315	ST258
GCA_001906645.1_Klebsiella_pneumoniae_1492_2_C_Contig	GCA_001906645	ST258
GCA_001906685.1_Klebsiella_pneumoniae_1491_2_B_Contig	GCA_001906685	ST258
GCA_001906705.1_Klebsiella_pneumoniae_1446_1_B_Contig	GCA_001906705	ST258
GCA_001906715.1_Klebsiella_pneumoniae_1431_1_C_Contig	GCA_001906715	ST258
GCA_001906725.1_Klebsiella_pneumoniae_1421_1_A_Contig	GCA_001906725	ST258
GCA_002056385.1_Klebsiella_pneumoniae_AR_0115_Complete_Genome	GCA_002056385	ST258
GCA_002056475.1_Klebsiella_pneumoniae_AR_0098_Complete_Genome	GCA_002056475	ST258
GCA_002086075.1_Klebsiella_pneumoniae_KPN_KPC_HUG_B5_Scaffold	GCA_002086075	ST258
GCA_002104185.1_Klebsiella_pneumoniae_4490_Contig	GCA_002104185	ST258
GCA_002104265.1_Klebsiella_pneumoniae_1849_Contig	GCA_002104265	ST258
GCA_002104295.1_Klebsiella_pneumoniae_4448_Contig	GCA_002104295	ST258
GCA_002115605.1_Klebsiella_pneumoniae_KP1246_Contig	GCA_002115605	ST258
GCA_002115625.1_Klebsiella_pneumoniae_KP1244_Contig	GCA_002115625	ST258
GCA_002115645.1_Klebsiella_pneumoniae_KP1245_Contig	GCA_002115645	ST258
GCA_002156725.1_Klebsiella_pneumoniae_BK13043_Complete_Genome	GCA_002156725	ST258
GCA_002162395.1_Klebsiella_pneumoniae_39384_Contig	GCA_002162395	ST258
GCA_002162405.1_Klebsiella_pneumoniae_40889_Contig	GCA_002162405	ST258
GCA_002162425.1_Klebsiella_pneumoniae_39884_Contig	GCA_002162425	ST258
GCA_002162475.1_Klebsiella_pneumoniae_41968_Contig	GCA_002162475	ST258
GCA_002180075.1_Klebsiella_pneumoniae_AR_0047_Complete_Genome	GCA_002180075	ST258
GCA_002180155.1_Klebsiella_pneumoniae_AR_0112_Complete_Genome	GCA_002180155	ST258
GCA_002180295.1_Klebsiella_pneumoniae_AR_0129_Complete_Genome	GCA_002180295	ST258
GCA_002180485.1_Klebsiella_pneumoniae_41949_Contig	GCA_002180485	ST258
GCA_002180525.1_Klebsiella_pneumoniae_41947_Contig	GCA_002180525	ST258
GCA_002180535.1_Klebsiella_pneumoniae_39385_Contig	GCA_002180535	ST258
GCA_002180565.1_Klebsiella_pneumoniae_39428_Contig	GCA_002180565	ST258
GCA_002180595.1_Klebsiella_pneumoniae_39427_Contig	GCA_002180595	ST258
GCA_002180605.1_Klebsiella_pneumoniae_39865_Contig	GCA_002180605	ST258
GCA_002180695.1_Klebsiella_pneumoniae_39901_Contig	GCA_002180695	ST258
GCA_002180735.1_Klebsiella_pneumoniae_39903_Contig	GCA_002180735	ST258
GCA_002180765.1_Klebsiella_pneumoniae_39910_Contig	GCA_002180765	ST258
GCA_002180775.1_Klebsiella_pneumoniae_39908_Contig	GCA_002180775	ST258
GCA_002180805.1_Klebsiella_pneumoniae_39911_Contig	GCA_002180805	ST258
GCA_002180845.1_Klebsiella_pneumoniae_40886_Contig	GCA_002180845	ST258
GCA_002180855.1_Klebsiella_pneumoniae_40862_Contig	GCA_002180855	ST258
GCA_002180885.1_Klebsiella_pneumoniae_40888_Contig	GCA_002180885	ST258
GCA_002180895.1_Klebsiella_pneumoniae_44829_Contig	GCA_002180895	ST258
GCA_002180925.1_Klebsiella_pneumoniae_44830_Contig	GCA_002180925	ST258
GCA_002180935.1_Klebsiella_pneumoniae_44831_Contig	GCA_002180935	ST258
GCA_002180965.1_Klebsiella_pneumoniae_45705_Contig	GCA_002180965	ST258
GCA_002180975.1_Klebsiella_pneumoniae_45706_Contig	GCA_002180975	ST258
GCA_002181005.1_Klebsiella_pneumoniae_42810_Contig	GCA_002181005	ST258
GCA_002181015.1_Klebsiella_pneumoniae_45708_Contig	GCA_002181015	ST258
GCA_002181045.1_Klebsiella_pneumoniae_42812_Contig	GCA_002181045	ST258
GCA_002181055.1_Klebsiella_pneumoniae_42811_Contig	GCA_002181055	ST258
GCA_002181085.1_Klebsiella_pneumoniae_42814_Contig	GCA_002181085	ST258
GCA_002181095.1_Klebsiella_pneumoniae_42859_Contig	GCA_002181095	ST258
GCA_002181105.1_Klebsiella_pneumoniae_43328_Contig	GCA_002181105	ST258
GCA_002181145.1_Klebsiella_pneumoniae_43329_Contig	GCA_002181145	ST258
GCA_002181165.1_Klebsiella_pneumoniae_43331_Contig	GCA_002181165	ST258
GCA_002181175.1_Klebsiella_pneumoniae_43422_Contig	GCA_002181175	ST258
GCA_002181185.1_Klebsiella_pneumoniae_44808_Contig	GCA_002181185	ST258
GCA_002181245.1_Klebsiella_pneumoniae_44811_Contig	GCA_002181245	ST258
GCA_002181265.1_Klebsiella_pneumoniae_44810_Contig	GCA_002181265	ST258
GCA_002181275.1_Klebsiella_pneumoniae_44813_Contig	GCA_002181275	ST258
GCA_002181305.1_Klebsiella_pneumoniae_44814_Contig	GCA_002181305	ST258
GCA_002181325.1_Klebsiella_pneumoniae_44815_Contig	GCA_002181325	ST258
GCA_002181345.1_Klebsiella_pneumoniae_44816_Contig	GCA_002181345	ST258
GCA_002181355.1_Klebsiella_pneumoniae_44817_Contig	GCA_002181355	ST258
GCA_002181405.1_Klebsiella_pneumoniae_44819_Contig	GCA_002181405	ST258
GCA_002181415.1_Klebsiella_pneumoniae_44820_Contig	GCA_002181415	ST258
GCA_002181455.1_Klebsiella_pneumoniae_41964_Contig	GCA_002181455	ST258
GCA_002181485.1_Klebsiella_pneumoniae_41965_Contig	GCA_002181485	ST258
GCA_002181505.1_Klebsiella_pneumoniae_41966_Contig	GCA_002181505	ST258
GCA_002181525.1_Klebsiella_pneumoniae_41950_Contig	GCA_002181525	ST258
GCA_002181545.1_Klebsiella_pneumoniae_41959_Contig	GCA_002181545	ST258
GCA_002181555.1_Klebsiella_pneumoniae_41963_Contig	GCA_002181555	ST258
GCA_002181585.1_Klebsiella_pneumoniae_39883_Contig	GCA_002181585	ST258
GCA_002181595.1_Klebsiella_pneumoniae_39885_Contig	GCA_002181595	ST258
GCA_002181665.1_Klebsiella_pneumoniae_39909_Contig	GCA_002181665	ST258
GCA_002181675.1_Klebsiella_pneumoniae_40882_Contig	GCA_002181675	ST258
GCA_002181705.1_Klebsiella_pneumoniae_44825_Contig	GCA_002181705	ST258
GCA_002181715.1_Klebsiella_pneumoniae_44826_Contig	GCA_002181715	ST258
GCA_002181745.1_Klebsiella_pneumoniae_44827_Contig	GCA_002181745	ST258
GCA_002181755.1_Klebsiella_pneumoniae_44828_Contig	GCA_002181755	ST258
GCA_002181785.1_Klebsiella_pneumoniae_45704_Contig	GCA_002181785	ST258
GCA_002181795.1_Klebsiella_pneumoniae_45707_Contig	GCA_002181795	ST258
GCA_002181825.1_Klebsiella_pneumoniae_43416_Contig	GCA_002181825	ST258
GCA_002181835.1_Klebsiella_pneumoniae_45709_Contig	GCA_002181835	ST258
GCA_002181865.1_Klebsiella_pneumoniae_44821_Contig	GCA_002181865	ST258
GCA_002181965.1_Klebsiella_pneumoniae_44823_Contig	GCA_002181965	ST258
GCA_002182005.1_Klebsiella_pneumoniae_42184_Contig	GCA_002182005	ST258
GCA_002182065.1_Klebsiella_pneumoniae_42188_Contig	GCA_002182065	ST258
GCA_002182125.1_Klebsiella_pneumoniae_42338_Contig	GCA_002182125	ST258
GCA_002182135.1_Klebsiella_pneumoniae_42261_Contig	GCA_002182135	ST258
GCA_002182155.1_Klebsiella_pneumoniae_42363_Contig	GCA_002182155	ST258
GCA_002182215.1_Klebsiella_pneumoniae_42807_Contig	GCA_002182215	ST258
GCA_002182285.1_Klebsiella_pneumoniae_45710_Contig	GCA_002182285	ST258
GCA_002182305.1_Klebsiella_pneumoniae_42362_Contig	GCA_002182305	ST258
GCA_002182325.1_Klebsiella_pneumoniae_42808_Contig	GCA_002182325	ST258
GCA_002182525.1_Klebsiella_pneumoniae_45712_Contig	GCA_002182525	ST258
GCA_002184115.1_Klebsiella_pneumoniae_39387_Contig	GCA_002184115	ST258
GCA_002184225.1_Klebsiella_pneumoniae_45711_Contig	GCA_002184225	ST258
GCA_002184395.1_Klebsiella_pneumoniae_ARLG_2984_Contig	GCA_002184395	ST258
GCA_002184415.1_Klebsiella_pneumoniae_ARLG_2983_Contig	GCA_002184415	ST258
GCA_002184505.1_Klebsiella_pneumoniae_ARLG_2981_Contig	GCA_002184505	ST258
GCA_002184515.1_Klebsiella_pneumoniae_ARLG_2982_Contig	GCA_002184515	ST258
GCA_002184525.1_Klebsiella_pneumoniae_ARLG_2978_Contig	GCA_002184525	ST258
GCA_002184705.1_Klebsiella_pneumoniae_ARLG_2956_Contig	GCA_002184705	ST258
GCA_002184715.1_Klebsiella_pneumoniae_ARLG_2951_Contig	GCA_002184715	ST258
GCA_002184755.1_Klebsiella_pneumoniae_ARLG_2820_Contig	GCA_002184755	ST258
GCA_002184785.1_Klebsiella_pneumoniae_ARLG_2794_Contig	GCA_002184785	ST258
GCA_002184795.1_Klebsiella_pneumoniae_ARLG_2791_Contig	GCA_002184795	ST258
GCA_002184825.1_Klebsiella_pneumoniae_ARLG_2758_Contig	GCA_002184825	ST258
GCA_002184835.1_Klebsiella_pneumoniae_ARLG_2745_Contig	GCA_002184835	ST258
GCA_002184865.1_Klebsiella_pneumoniae_ARLG_2737_Contig	GCA_002184865	ST258
GCA_002184875.1_Klebsiella_pneumoniae_ARLG_2727R_Contig	GCA_002184875	ST258
GCA_002184945.1_Klebsiella_pneumoniae_ARLG_2570_Contig	GCA_002184945	ST258
GCA_002185025.1_Klebsiella_pneumoniae_ARLG_2483_Contig	GCA_002185025	ST258
GCA_002185045.1_Klebsiella_pneumoniae_ARLG_2480_Contig	GCA_002185045	ST258
GCA_002185055.1_Klebsiella_pneumoniae_ARLG_2459_Contig	GCA_002185055	ST258
GCA_002185075.1_Klebsiella_pneumoniae_ARLG_2176_Contig	GCA_002185075	ST258
GCA_002185105.1_Klebsiella_pneumoniae_ARLG_2131_Contig	GCA_002185105	ST258
GCA_002185125.1_Klebsiella_pneumoniae_ARLG_2130_Contig	GCA_002185125	ST258
GCA_002185135.1_Klebsiella_pneumoniae_ARLG_2123_Contig	GCA_002185135	ST258
GCA_002185155.1_Klebsiella_pneumoniae_ARLG_2122_Contig	GCA_002185155	ST258
GCA_002185185.1_Klebsiella_pneumoniae_ARLG_2082_Contig	GCA_002185185	ST258
GCA_002185205.1_Klebsiella_pneumoniae_ARLG_2051_Contig	GCA_002185205	ST258
GCA_002185215.1_Klebsiella_pneumoniae_ARLG_2003_Contig	GCA_002185215	ST258
GCA_002185385.1_Klebsiella_pneumoniae_ARLG_2862_Contig	GCA_002185385	ST258
GCA_002185415.1_Klebsiella_pneumoniae_ARLG_2800_Contig	GCA_002185415	ST258
GCA_002185425.1_Klebsiella_pneumoniae_ARLG_2806_Contig	GCA_002185425	ST258
GCA_002185465.1_Klebsiella_pneumoniae_ARLG_2723_Contig	GCA_002185465	ST258
GCA_002185485.1_Klebsiella_pneumoniae_ARLG_2718_Contig	GCA_002185485	ST258
GCA_002185495.1_Klebsiella_pneumoniae_ARLG_2709_Contig	GCA_002185495	ST258
GCA_002185545.1_Klebsiella_pneumoniae_ARLG_2585_Contig	GCA_002185545	ST258
GCA_002185555.1_Klebsiella_pneumoniae_ARLG_2568_Contig	GCA_002185555	ST258
GCA_002185565.1_Klebsiella_pneumoniae_ARLG_2550_Contig	GCA_002185565	ST258
GCA_002185625.1_Klebsiella_pneumoniae_ARLG_2191_Contig	GCA_002185625	ST258
GCA_002185645.1_Klebsiella_pneumoniae_ARLG_2485_Contig	GCA_002185645	ST258
GCA_002185655.1_Klebsiella_pneumoniae_ARLG_2134_Contig	GCA_002185655	ST258
GCA_002185665.1_Klebsiella_pneumoniae_ARLG_2423_Contig	GCA_002185665	ST258
GCA_002185705.1_Klebsiella_pneumoniae_ARLG_2132_Contig	GCA_002185705	ST258
GCA_002185725.1_Klebsiella_pneumoniae_ARLG_2079_Contig	GCA_002185725	ST258
GCA_002185735.1_Klebsiella_pneumoniae_ARLG_2060_Contig	GCA_002185735	ST258
GCA_002185745.1_Klebsiella_pneumoniae_ARLG_2021_Contig	GCA_002185745	ST258
GCA_002185805.1_Klebsiella_pneumoniae_ARLG_2012_Contig	GCA_002185805	ST258
GCA_002185815.1_Klebsiella_pneumoniae_ARLG_2958_Contig	GCA_002185815	ST258
GCA_002185835.1_Klebsiella_pneumoniae_ARLG_2008_Contig	GCA_002185835	ST258
GCA_002185905.1_Klebsiella_pneumoniae_ARLG_2877_Contig	GCA_002185905	ST258
GCA_002185915.1_Klebsiella_pneumoniae_ARLG_2859_Contig	GCA_002185915	ST258
GCA_002185925.1_Klebsiella_pneumoniae_ARLG_2873_Contig	GCA_002185925	ST258
GCA_002186015.1_Klebsiella_pneumoniae_ARLG_2744_Contig	GCA_002186015	ST258
GCA_002186045.1_Klebsiella_pneumoniae_ARLG_2695_Contig	GCA_002186045	ST258
GCA_002186055.1_Klebsiella_pneumoniae_ARLG_2722_Contig	GCA_002186055	ST258
GCA_002186085.1_Klebsiella_pneumoniae_ARLG_2686_Contig	GCA_002186085	ST258
GCA_002186095.1_Klebsiella_pneumoniae_ARLG_2552_Contig	GCA_002186095	ST258
GCA_002186125.1_Klebsiella_pneumoniae_ARLG_2523_Contig	GCA_002186125	ST258
GCA_002186135.1_Klebsiella_pneumoniae_ARLG_2536_Contig	GCA_002186135	ST258
GCA_002186165.1_Klebsiella_pneumoniae_ARLG_2520_Contig	GCA_002186165	ST258
GCA_002186185.1_Klebsiella_pneumoniae_ARLG_2515_Contig	GCA_002186185	ST258
GCA_002186215.1_Klebsiella_pneumoniae_ARLG_2487_Contig	GCA_002186215	ST258
GCA_002186245.1_Klebsiella_pneumoniae_ARLG_2426_Contig	GCA_002186245	ST258
GCA_002186265.1_Klebsiella_pneumoniae_ARLG_2188_Contig	GCA_002186265	ST258
GCA_002186275.1_Klebsiella_pneumoniae_ARLG_2182_Contig	GCA_002186275	ST258
GCA_002186325.1_Klebsiella_pneumoniae_ARLG_2133_Contig	GCA_002186325	ST258
GCA_002186335.1_Klebsiella_pneumoniae_ARLG_2084_Contig	GCA_002186335	ST258
GCA_002186365.1_Klebsiella_pneumoniae_ARLG_2089_Contig	GCA_002186365	ST258
GCA_002186375.1_Klebsiella_pneumoniae_ARLG_2080_Contig	GCA_002186375	ST258
GCA_002186405.1_Klebsiella_pneumoniae_ARLG_2022_Contig	GCA_002186405	ST258
GCA_002186415.1_Klebsiella_pneumoniae_ARLG_2027_Contig	GCA_002186415	ST258
GCA_002192335.1_Klebsiella_pneumoniae_AR_0113_Complete_Genome	GCA_002192335	ST258
GCA_002197225.1_Klebsiella_pneumoniae_AR_0120_Complete_Genome	GCA_002197225	ST258
GCA_002197505.1_Klebsiella_pneumoniae_AR_0125_Complete_Genome	GCA_002197505	ST258
GCA_002235325.1_Klebsiella_pneumoniae_49_Contig	GCA_002235325	ST258
GCA_002235355.1_Klebsiella_pneumoniae_46_Scaffold	GCA_002235355	ST258
GCA_002235435.1_Klebsiella_pneumoniae_45_Contig	GCA_002235435	ST258
GCA_002235535.1_Klebsiella_pneumoniae_36_Contig	GCA_002235535	ST258
GCA_002235635.1_Klebsiella_pneumoniae_26_Scaffold	GCA_002235635	ST258
GCA_002235655.1_Klebsiella_pneumoniae_25_Contig	GCA_002235655	ST258
GCA_002235735.1_Klebsiella_pneumoniae_3_Contig	GCA_002235735	ST258
GCA_002235875.1_Klebsiella_pneumoniae_22_Contig	GCA_002235875	ST258
GCA_002235915.1_Klebsiella_pneumoniae_11_Contig	GCA_002235915	ST258
GCA_002235935.1_Klebsiella_pneumoniae_17_Contig	GCA_002235935	ST258
GCA_002235975.1_Klebsiella_pneumoniae_13_Scaffold	GCA_002235975	ST258
GCA_002235985.1_Klebsiella_pneumoniae_2_Scaffold	GCA_002235985	ST258
GCA_002236015.1_Klebsiella_pneumoniae_7_Contig	GCA_002236015	ST258
GCA_002236055.1_Klebsiella_pneumoniae_4_Contig	GCA_002236055	ST258
GCA_002243445.1_Klebsiella_pneumoniae_BIC_1_Complete_Genome	GCA_002243445	ST258
GCA_002249975.1_Klebsiella_pneumoniae_AUSMDU00008079_Complete_Genome	GCA_002249975	ST258
GCA_002268655.1_Klebsiella_pneumoniae_H5_Contig	GCA_002268655	ST258
GCA_002268675.1_Klebsiella_pneumoniae_F2_Contig	GCA_002268675	ST258
GCA_002268725.1_Klebsiella_pneumoniae_C4_Contig	GCA_002268725	ST258
GCA_002268755.1_Klebsiella_pneumoniae_F9_Contig	GCA_002268755	ST258
GCA_002268775.1_Klebsiella_pneumoniae_E5_Contig	GCA_002268775	ST258
GCA_002268785.1_Klebsiella_pneumoniae_C3_Contig	GCA_002268785	ST258
GCA_002268815.1_Klebsiella_pneumoniae_B8_Contig	GCA_002268815	ST258
GCA_002268825.1_Klebsiella_pneumoniae_I2_Contig	GCA_002268825	ST258
GCA_002268855.1_Klebsiella_pneumoniae_H4_Contig	GCA_002268855	ST258
GCA_002268865.1_Klebsiella_pneumoniae_F8_Contig	GCA_002268865	ST258
GCA_002268895.1_Klebsiella_pneumoniae_F3_Contig	GCA_002268895	ST258
GCA_002268915.1_Klebsiella_pneumoniae_B9_Contig	GCA_002268915	ST258
GCA_002268925.1_Klebsiella_pneumoniae_I1_Contig	GCA_002268925	ST258
GCA_002268935.1_Klebsiella_pneumoniae_D4_Contig	GCA_002268935	ST258
GCA_002269795.1_Klebsiella_pneumoniae_B5_Contig	GCA_002269795	ST258
GCA_002269815.1_Klebsiella_pneumoniae_C2_Contig	GCA_002269815	ST258
GCA_002271295.1_Klebsiella_pneumoniae_NU_CRE212_Contig	GCA_002271295	ST258
GCA_002271345.1_Klebsiella_pneumoniae_NU_CRE176_Contig	GCA_002271345	ST258
GCA_002271825.1_Klebsiella_pneumoniae_D7_Contig	GCA_002271825	ST258
GCA_002812365.1_Klebsiella_pneumoniae_AUSMDU00003562_Complete_Genome	GCA_002812365	ST258
GCA_002812385.1_Klebsiella_pneumoniae_AUSMDU00008119_Complete_Genome	GCA_002812385	ST258
GCA_002851035.1_Klebsiella_pneumoniae_COL_Kpn20_Contig	GCA_002851035	ST258
GCA_002854235.1_Klebsiella_pneumoniae_COL_Kpn89_Contig	GCA_002854235	ST258
GCA_002854275.1_Klebsiella_pneumoniae_COL_Kpn86_Contig	GCA_002854275	ST258
GCA_002854295.1_Klebsiella_pneumoniae_COL_Kpn83_Contig	GCA_002854295	ST258
GCA_002854335.1_Klebsiella_pneumoniae_COL_Kpn82_Contig	GCA_002854335	ST258
GCA_002854375.1_Klebsiella_pneumoniae_COL_Kpn77_Contig	GCA_002854375	ST258
GCA_002854385.1_Klebsiella_pneumoniae_COL_Kpn75_Contig	GCA_002854385	ST258
GCA_002854415.1_Klebsiella_pneumoniae_COL_Kpn74_Contig	GCA_002854415	ST258
GCA_002854435.1_Klebsiella_pneumoniae_COL_Kpn71_Contig	GCA_002854435	ST258
GCA_002854465.1_Klebsiella_pneumoniae_COL_Kpn70_Contig	GCA_002854465	ST258
GCA_002854495.1_Klebsiella_pneumoniae_COL_Kpn65_Contig	GCA_002854495	ST258
GCA_002854735.1_Klebsiella_pneumoniae_COL_Kpn48_Contig	GCA_002854735	ST258
GCA_002854865.1_Klebsiella_pneumoniae_COL_Kpn103_Contig	GCA_002854865	ST258
GCA_002854895.1_Klebsiella_pneumoniae_COL_Kpn101_Contig	GCA_002854895	ST258
GCA_002854975.1_Klebsiella_pneumoniae_COL_Kpn96_Contig	GCA_002854975	ST258
GCA_002854995.1_Klebsiella_pneumoniae_COL_Kpn92_Contig	GCA_002854995	ST258
GCA_002855035.1_Klebsiella_pneumoniae_COL_Kpn91_Contig	GCA_002855035	ST258
GCA_002855045.1_Klebsiella_pneumoniae_COL_Kpn88_Contig	GCA_002855045	ST258
GCA_002855075.1_Klebsiella_pneumoniae_COL_Kpn84_Contig	GCA_002855075	ST258
GCA_002855115.1_Klebsiella_pneumoniae_COL_Kpn79_Contig	GCA_002855115	ST258
GCA_002855125.1_Klebsiella_pneumoniae_COL_Kpn78_Contig	GCA_002855125	ST258
GCA_002855195.1_Klebsiella_pneumoniae_COL_Kpn72_Contig	GCA_002855195	ST258
GCA_002855275.1_Klebsiella_pneumoniae_COL_Kpn66_Contig	GCA_002855275	ST258
GCA_000766125.1_Klebsiella_pneumoniae_349_Contig	GCA_000766125	ST268
GCA_000822245.1_Klebsiella_pneumoniae_Contig	GCA_000822245	ST268
GCA_002264845.1_Klebsiella_pneumoniae_K604_Contig	GCA_002264845	ST268
GCA_900173055.1_Klebsiella_pneumoniae_VRES1173_Scaffold	GCA_900173055	ST268
GCA_900173185.1_Klebsiella_pneumoniae_VRES1178_Scaffold	GCA_900173185	ST268
GCA_001483725.1_Klebsiella_pneumoniae_K45_67_Contig	GCA_001483725	ST273
GCA_001663435.1_Klebsiella_pneumoniae_Kpn223_Complete_Genome	GCA_001663435	ST273
GCA_002108235.1_Klebsiella_pneumoniae_ARPG_340_Scaffold	GCA_002108235	ST273
GCA_002108245.1_Klebsiella_pneumoniae_ARPG_372_Scaffold	GCA_002108245	ST273
GCA_002108285.1_Klebsiella_pneumoniae_ARPG_379_Scaffold	GCA_002108285	ST273
GCA_002108405.1_Klebsiella_pneumoniae_ARPG_380_Scaffold	GCA_002108405	ST273
GCA_002108415.1_Klebsiella_pneumoniae_ARPG_381_Scaffold	GCA_002108415	ST273
GCA_002854655.1_Klebsiella_pneumoniae_COL_Kpn50_Contig	GCA_002854655	ST273
GCA_002854815.1_Klebsiella_pneumoniae_COL_Kpn113_Contig	GCA_002854815	ST273
GCA_001456055.3_Klebsiella_pneumoniae_KpN01_Complete_Genome	GCA_001456055	ST278
GCA_001456095.3_Klebsiella_pneumoniae_KpN06_Complete_Genome	GCA_001456095	ST278
GCA_001884315.1_Klebsiella_pneumoniae_KpN03_Contig	GCA_001884315	ST278
GCA_001884325.1_Klebsiella_pneumoniae_KpN07_Contig	GCA_001884325	ST278
GCA_001884335.1_Klebsiella_pneumoniae_KpN02_Contig	GCA_001884335	ST278
GCA_001884385.1_Klebsiella_pneumoniae_KpN08_Contig	GCA_001884385	ST278
GCA_001884395.1_Klebsiella_pneumoniae_KpN04_Contig	GCA_001884395	ST278
GCA_001884415.1_Klebsiella_pneumoniae_KpN05_Contig	GCA_001884415	ST278
GCA_001884425.1_Klebsiella_pneumoniae_KpN10_Contig	GCA_001884425	ST278
GCA_001884465.1_Klebsiella_pneumoniae_KpN09_Contig	GCA_001884465	ST278
GCA_001884485.1_Klebsiella_pneumoniae_KpN11_Contig	GCA_001884485	ST278
GCA_000465975.2_Klebsiella_pneumoniae_KP_1_Complete_Genome	GCA_000465975	ST29
GCA_000785625.1_Klebsiella_pneumoniae_XDR_Scaffold	GCA_000785625	ST29
GCA_000822945.1_Klebsiella_pneumoniae_Contig	GCA_000822945	ST29
GCA_001549995.1_Klebsiella_pneumoniae_LPKP_Contig	GCA_001549995	ST29
GCA_001630805.1_Klebsiella_pneumoniae_SCLZ15_011_Scaffold	GCA_001630805	ST29
GCA_002119085.1_Klebsiella_pneumoniae_KPHU468_Contig	GCA_002119085	ST29
GCA_002174015.1_Klebsiella_pneumoniae_2045_Contig	GCA_002174015	ST29
GCA_002752775.1_Klebsiella_pneumoniae_INF249_Complete_Genome	GCA_002752775	ST29
GCA_002752815.1_Klebsiella_pneumoniae_INF322_Complete_Genome	GCA_002752815	ST29
GCA_002181875.1_Klebsiella_pneumoniae_43420_Contig	GCA_002181875	ST299
GCA_002182145.1_Klebsiella_pneumoniae_42339_Contig	GCA_002182145	ST299
GCA_002775255.1_Klebsiella_pneumoniae_AUH_KIMP300_Contig	GCA_002775255	ST299
GCA_002850995.1_Klebsiella_pneumoniae_COL_Kpn28_Contig	GCA_002850995	ST299
GCA_000281755.1_Klebsiella_pneumoniae_DSM_30104_Contig	GCA_000281755	ST3
GCA_000788025.1_Klebsiella_pneumoniae_4640_Scaffold	GCA_000788025	ST3
GCA_001590945.1_Klebsiella_pneumoniae_NBRC_14940_Contig	GCA_001590945	ST3
GCA_000821465.1_Klebsiella_pneumoniae_Contig	GCA_000821465	ST307
GCA_000821605.1_Klebsiella_pneumoniae_Contig	GCA_000821605	ST307
GCA_000822005.1_Klebsiella_pneumoniae_Contig	GCA_000822005	ST307
GCA_000823125.1_Klebsiella_pneumoniae_Contig	GCA_000823125	ST307
GCA_001566595.1_Klebsiella_pneumoniae_KP48_Contig	GCA_001566595	ST307
GCA_001597075.1_Klebsiella_pneumoniae_KP_33F_Scaffold	GCA_001597075	ST307
GCA_001720845.1_Klebsiella_pneumoniae_CFSAN044564_Contig	GCA_001720845	ST307
GCA_001902865.3_Klebsiella_pneumoniae_1477_2395_Contig	GCA_001902865	ST307
GCA_001903615.3_Klebsiella_pneumoniae_1165_2048_Contig	GCA_001903615	ST307
GCA_001903695.3_Klebsiella_pneumoniae_804_1777_Contig	GCA_001903695	ST307
GCA_002148835.1_Klebsiella_pneumoniae_KPN11_Scaffold	GCA_002148835	ST307
GCA_002166915.1_Klebsiella_pneumoniae_Kp_KL49_Contig	GCA_002166915	ST307
GCA_002166955.1_Klebsiella_pneumoniae_CIV_4_Contig	GCA_002166955	ST307
GCA_002166965.1_Klebsiella_pneumoniae_KH43_Contig	GCA_002166965	ST307
GCA_002184915.1_Klebsiella_pneumoniae_ARLG_2725_Contig	GCA_002184915	ST307
GCA_002185575.1_Klebsiella_pneumoniae_ARLG_2512_Contig	GCA_002185575	ST307
GCA_002186005.1_Klebsiella_pneumoniae_ARLG_2753_Contig	GCA_002186005	ST307
GCA_002186255.1_Klebsiella_pneumoniae_ARLG_2429_Contig	GCA_002186255	ST307
GCA_002187305.1_Klebsiella_pneumoniae_G3435_Contig	GCA_002187305	ST307
GCA_002188055.1_Klebsiella_pneumoniae_G3051_Contig	GCA_002188055	ST307
GCA_002235035.1_Klebsiella_pneumoniae_67_Scaffold	GCA_002235035	ST307
GCA_002235175.1_Klebsiella_pneumoniae_58_Scaffold	GCA_002235175	ST307
GCA_002235215.1_Klebsiella_pneumoniae_56_Scaffold	GCA_002235215	ST307
GCA_002239875.1_Klebsiella_pneumoniae_ESBL_SIUK_7_Contig	GCA_002239875	ST307
GCA_002283495.1_Klebsiella_pneumoniae_GMR_RA_453_16_Contig	GCA_002283495	ST307
GCA_002807065.1_Klebsiella_pneumoniae_KP_DC_Scaffold	GCA_002807065	ST307
GCA_002833425.1_Klebsiella_pneumoniae_NR5632_Complete_Genome	GCA_002833425	ST307
GCA_002833445.1_Klebsiella_pneumoniae_KP1768_Complete_Genome	GCA_002833445	ST307
GCA_002833465.1_Klebsiella_pneumoniae_KP1766_Complete_Genome	GCA_002833465	ST307
GCA_900205365.1_Klebsiella_pneumoniae_PV2BC_Contig	GCA_900205365	ST307
GCA_900205375.1_Klebsiella_pneumoniae_PV13BC_Contig	GCA_900205375	ST307
GCA_900205395.1_Klebsiella_pneumoniae_PV7BC_Contig	GCA_900205395	ST307
GCA_000821965.1_Klebsiella_pneumoniae_Contig	GCA_000821965	ST323
GCA_000822145.1_Klebsiella_pneumoniae_Contig	GCA_000822145	ST323
GCA_001316845.2_Klebsiella_pneumoniae_ST323_941530379_Contig	GCA_001316845	ST323
GCA_002417085.1_Klebsiella_pneumoniae_ST_323_K090_Contig	GCA_002417085	ST323
GCA_002752905.1_Klebsiella_pneumoniae_KSB1_7E_Complete_Genome	GCA_002752905	ST323
GCA_002753035.1_Klebsiella_pneumoniae_KSB1_10J_Complete_Genome	GCA_002753035	ST323
GCA_002754835.1_Klebsiella_pneumoniae_KSB1_4E_Complete_Genome	GCA_002754835	ST323
GCA_900093265.1_Klebsiella_pneumoniae_PB157_Scaffold	GCA_900093265	ST323
GCA_001441295.1_Klebsiella_pneumoniae_B199_Scaffold	GCA_001441295	ST327
GCA_001875135.1_Klebsiella_pneumoniae_AR_0044_Contig	GCA_001875135	ST327
GCA_002182235.1_Klebsiella_pneumoniae_42365_Contig	GCA_002182235	ST327
GCA_000498775.2_Klebsiella_pneumoniae_LAU_KP1_Contig	GCA_000498775	ST336
GCA_001463215.1_Klebsiella_pneumoniae_50675619_Contig	GCA_001463215	ST336
GCA_001463105.1_Klebsiella_pneumoniae_50606221_Contig	GCA_001463105	ST340
GCA_001718115.1_Klebsiella_pneumoniae_1194_Scaffold	GCA_001718115	ST340
GCA_001718175.1_Klebsiella_pneumoniae_606B_Scaffold	GCA_001718175	ST340
GCA_001902535.1_Klebsiella_pneumoniae_CAV1417_Complete_Genome	GCA_001902535	ST340
GCA_001908715.1_Klebsiella_pneumoniae_CAV1217_Complete_Genome	GCA_001908715	ST340
GCA_001952895.1_Klebsiella_pneumoniae_NY9_Complete_Genome	GCA_001952895	ST340
GCA_002104175.1_Klebsiella_pneumoniae_1714_Contig	GCA_002104175	ST340
GCA_002104255.1_Klebsiella_pneumoniae_4281_Contig	GCA_002104255	ST340
GCA_002104365.1_Klebsiella_pneumoniae_4477_Contig	GCA_002104365	ST340
GCA_002154825.1_Klebsiella_pneumoniae_SJRP_Kp10_Contig	GCA_002154825	ST340
GCA_002205055.1_Klebsiella_pneumoniae_872_Contig	GCA_002205055	ST340
GCA_002289105.1_Klebsiella_pneumoniae_KPC02_Scaffold	GCA_002289105	ST340
GCA_002300755.1_Klebsiella_pneumoniae_B29_Scaffold	GCA_002300755	ST340
GCA_002304205.1_Klebsiella_pneumoniae_KPN535_Contig	GCA_002304205	ST340
GCA_002386225.2_Klebsiella_pneumoniae_FDAARGOS_445_Chromosome	GCA_002386225	ST340
GCA_002587885.1_Klebsiella_pneumoniae_FDAARGOS_446_Complete_Genome	GCA_002587885	ST340
GCA_002636095.1_Klebsiella_pneumoniae_FDAARGOS_436_Chromosome	GCA_002636095	ST340
GCA_002741685.1_Klebsiella_pneumoniae_KSB1_5D_Complete_Genome	GCA_002741685	ST340
GCA_002752975.1_Klebsiella_pneumoniae_INF278_Complete_Genome	GCA_002752975	ST340
GCA_002753055.1_Klebsiella_pneumoniae_INF158_Complete_Genome	GCA_002753055	ST340
GCA_002753075.1_Klebsiella_pneumoniae_INF157_Complete_Genome	GCA_002753075	ST340
GCA_002753165.1_Klebsiella_pneumoniae_KSB1_9D_Complete_Genome	GCA_002753165	ST340
GCA_002753405.1_Klebsiella_pneumoniae_INF163_Complete_Genome	GCA_002753405	ST340
GCA_002753555.1_Klebsiella_pneumoniae_INF164_Complete_Genome	GCA_002753555	ST340
GCA_002753605.1_Klebsiella_pneumoniae_INF274_Complete_Genome	GCA_002753605	ST340
GCA_002834285.1_Klebsiella_pneumoniae_1ECKPC_Contig	GCA_002834285	ST340
GCA_900091635.1_Klebsiella_pneumoniae_BJSTC_c_Contig	GCA_900091635	ST340
GCA_900091645.1_Klebsiella_pneumoniae_BJSTC_a_Contig	GCA_900091645	ST340
GCA_900091665.1_Klebsiella_pneumoniae_BJSTC_b_Contig	GCA_900091665	ST340
GCA_000346145.1_Klebsiella_pneumoniae_RYC492_Chromosome	GCA_000346145	ST35
GCA_000350325.1_Klebsiella_pneumoniae_HSL4_Contig	GCA_000350325	ST35
GCA_000821765.1_Klebsiella_pneumoniae_Contig	GCA_000821765	ST35
GCA_000821785.1_Klebsiella_pneumoniae_Contig	GCA_000821785	ST35
GCA_000822725.1_Klebsiella_pneumoniae_Contig	GCA_000822725	ST35
GCA_000822985.1_Klebsiella_pneumoniae_Contig	GCA_000822985	ST35
GCA_001950635.1_Klebsiella_pneumoniae_MRY10_808_Contig	GCA_001950635	ST35
GCA_002181385.1_Klebsiella_pneumoniae_44818_Contig	GCA_002181385	ST35
GCA_002246075.1_Klebsiella_pneumoniae_ECCTRSRTH01_Contig	GCA_002246075	ST35
GCA_002775395.1_Klebsiella_pneumoniae_AUH_KIMP215_Contig	GCA_002775395	ST35
GCA_002853735.1_Klebsiella_pneumoniae_COL_Kpn125_Contig	GCA_002853735	ST35
GCA_002866615.1_Klebsiella_pneumoniae_AUH_KIMP182_Contig	GCA_002866615	ST35
GCA_000499865.1_Klebsiella_pneumoniae_KpQ15_Contig	GCA_000499865	ST37
GCA_000499885.1_Klebsiella_pneumoniae_KpQ24_Contig	GCA_000499885	ST37
GCA_000710075.1_Klebsiella_pneumoniae_5422_Contig	GCA_000710075	ST37
GCA_000821585.1_Klebsiella_pneumoniae_Contig	GCA_000821585	ST37
GCA_000821825.1_Klebsiella_pneumoniae_Contig	GCA_000821825	ST37
GCA_000822505.1_Klebsiella_pneumoniae_Contig	GCA_000822505	ST37
GCA_000822545.1_Klebsiella_pneumoniae_Contig	GCA_000822545	ST37
GCA_000822825.1_Klebsiella_pneumoniae_Contig	GCA_000822825	ST37
GCA_001463445.1_Klebsiella_pneumoniae_50877064_Contig	GCA_001463445	ST37
GCA_001663295.1_Klebsiella_pneumoniae_KPNIH39_Complete_Genome	GCA_001663295	ST37
GCA_001665995.1_Klebsiella_pneumoniae_KPNIH38_Contig	GCA_001665995	ST37
GCA_001702405.1_Klebsiella_pneumoniae_CCBH15949_Contig	GCA_001702405	ST37
GCA_001931705.1_Klebsiella_pneumoniae_38_wz_Contig	GCA_001931705	ST37
GCA_002156745.1_Klebsiella_pneumoniae_KPN1482_Complete_Genome	GCA_002156745	ST37
GCA_002185285.1_Klebsiella_pneumoniae_ARLG_2953_Contig	GCA_002185285	ST37
GCA_002246835.1_Klebsiella_pneumoniae_KPCRETH10_Contig	GCA_002246835	ST37
GCA_002257795.1_Klebsiella_pneumoniae_WCHKP1716_Contig	GCA_002257795	ST37
GCA_002257865.1_Klebsiella_pneumoniae_WCHKP1368_Contig	GCA_002257865	ST37
GCA_002261815.1_Klebsiella_pneumoniae_L528_Contig	GCA_002261815	ST37
GCA_002261855.1_Klebsiella_pneumoniae_L535_Contig	GCA_002261855	ST37
GCA_002261895.1_Klebsiella_pneumoniae_L527_Contig	GCA_002261895	ST37
GCA_002261915.1_Klebsiella_pneumoniae_L520_Contig	GCA_002261915	ST37
GCA_002262015.1_Klebsiella_pneumoniae_L514_Contig	GCA_002262015	ST37
GCA_002752995.1_Klebsiella_pneumoniae_INF042_Complete_Genome	GCA_002752995	ST37
GCA_002753355.1_Klebsiella_pneumoniae_INF059_Complete_Genome	GCA_002753355	ST37
GCA_002753375.1_Klebsiella_pneumoniae_KSB1_7J_Complete_Genome	GCA_002753375	ST37
GCA_002775345.1_Klebsiella_pneumoniae_AUH_KIMP198_Contig	GCA_002775345	ST37
GCA_002814015.1_Klebsiella_pneumoniae_459_Complete_Genome	GCA_002814015	ST37
GCA_002850595.1_Klebsiella_pneumoniae_SCKP020077_Contig	GCA_002850595	ST37
GCA_002853355.1_Klebsiella_pneumoniae_ozaenae_SCKP020150_Scaffold	GCA_002853355	ST37
GCA_900093025.1_Klebsiella_pneumoniae_W2_5_ERG4_Scaffold	GCA_900093025	ST37
GCA_000220485.1_Klebsiella_pneumoniae_KCTC_2242_Complete_Genome	GCA_000220485	ST375
GCA_000949515.1_Klebsiella_pneumoniae_DSM_2026_Contig	GCA_000949515	ST375
GCA_002260725.1_Klebsiella_pneumoniae_40B3_Contig	GCA_002260725	ST375
GCA_001067895.1_Klebsiella_pneumoniae_913_KPNE_Contig	GCA_001067895	ST380
GCA_001067955.1_Klebsiella_pneumoniae_930_KPNE_Contig	GCA_001067955	ST380
GCA_001067975.1_Klebsiella_pneumoniae_ozaenae_977_rep1_SDYS_Contig	GCA_001067975	ST380
GCA_001068335.1_Klebsiella_pneumoniae_ozaenae_977_rep2_SDYS_Contig	GCA_001068335	ST380
GCA_001077215.1_Klebsiella_pneumoniae_912_KPNE_Contig	GCA_001077215	ST380
GCA_001611055.1_Klebsiella_pneumoniae_TGH8_Complete_Genome	GCA_001611055	ST383
GCA_001611095.1_Klebsiella_pneumoniae_TGH10_Complete_Genome	GCA_001611095	ST383
GCA_001701935.1_Klebsiella_pneumoniae_6_GR_12_Contig	GCA_001701935	ST383
GCA_001701985.1_Klebsiella_pneumoniae_5_GR_13_Contig	GCA_001701985	ST383
GCA_002186785.1_Klebsiella_pneumoniae_PO1932_Contig	GCA_002186785	ST39
GCA_002416695.1_Klebsiella_pneumoniae_ST_39_K0179_Contig	GCA_002416695	ST39
GCA_002417455.1_Klebsiella_pneumoniae_ST_39_K145_Contig	GCA_002417455	ST39
GCA_002850915.1_Klebsiella_pneumoniae_COL_Kpn32_Contig	GCA_002850915	ST39
GCA_002851395.1_Klebsiella_pneumoniae_COL_Kpn37_Contig	GCA_002851395	ST39
GCA_000785005.1_Klebsiella_pneumoniae_KPNIH31_Complete_Genome	GCA_000785005	ST392
GCA_000807515.2_Klebsiella_pneumoniae_6234_Contig	GCA_000807515	ST392
GCA_001952875.1_Klebsiella_pneumoniae_CN1_Complete_Genome	GCA_001952875	ST392
GCA_002108395.1_Klebsiella_pneumoniae_ARPG_489_Scaffold	GCA_002108395	ST392
GCA_002180725.1_Klebsiella_pneumoniae_39902_Contig	GCA_002180725	ST392
GCA_002181445.1_Klebsiella_pneumoniae_44824_Contig	GCA_002181445	ST392
GCA_002189325.1_Klebsiella_pneumoniae_C13_E9_15_Contig	GCA_002189325	ST392
GCA_000223435.2_Klebsiella_pneumoniae_1191100241_Contig	GCA_000223435	ST395
GCA_000739495.1_Klebsiella_pneumoniae_blaNDM_1_Complete_Genome	GCA_000739495	ST395
GCA_000787995.1_Klebsiella_pneumoniae_101488_Scaffold	GCA_000787995	ST395
GCA_000821985.1_Klebsiella_pneumoniae_Contig	GCA_000821985	ST395
GCA_000822125.1_Klebsiella_pneumoniae_Contig	GCA_000822125	ST395
GCA_001902355.1_Klebsiella_pneumoniae_Kp_Goe_62629_Complete_Genome	GCA_001902355	ST395
GCA_002406555.1_Klebsiella_pneumoniae_C7_Scaffold	GCA_002406555	ST395
GCA_002406905.1_Klebsiella_pneumoniae_C12_Scaffold	GCA_002406905	ST395
GCA_000300735.3_Klebsiella_pneumoniae_KpO3210_Scaffold	GCA_000300735	ST405
GCA_000821925.1_Klebsiella_pneumoniae_Contig	GCA_000821925	ST405
GCA_000822765.1_Klebsiella_pneumoniae_Contig	GCA_000822765	ST405
GCA_001462905.1_Klebsiella_pneumoniae_50572569_Contig	GCA_001462905	ST405
GCA_002188095.1_Klebsiella_pneumoniae_G160_Contig	GCA_002188095	ST405
GCA_002184995.1_Klebsiella_pneumoniae_ARLG_2491_Contig	GCA_002184995	ST418
GCA_002187185.1_Klebsiella_pneumoniae_G4605_Contig	GCA_002187185	ST429
GCA_002187975.1_Klebsiella_pneumoniae_G4606_Contig	GCA_002187975	ST429
GCA_002188015.1_Klebsiella_pneumoniae_G4597_Contig	GCA_002188015	ST429
GCA_001597065.1_Klebsiella_pneumoniae_KP_86L_Scaffold	GCA_001597065	ST437
GCA_001701915.1_Klebsiella_pneumoniae_11_BR_13_Contig	GCA_001701915	ST437
GCA_001715215.1_Klebsiella_pneumoniae_CCBH17440_Contig	GCA_001715215	ST437
GCA_001968745.2_Klebsiella_pneumoniae_196_Scaffold	GCA_001968745	ST437
GCA_001968755.2_Klebsiella_pneumoniae_148_Scaffold	GCA_001968755	ST437
GCA_002211665.1_Klebsiella_pneumoniae_704SK6_Chromosome	GCA_002211665	ST437
GCA_002251715.1_Klebsiella_pneumoniae_3111F_Contig	GCA_002251715	ST437
GCA_002300715.1_Klebsiella_pneumoniae_B03_Scaffold	GCA_002300715	ST437
GCA_002300785.1_Klebsiella_pneumoniae_B30_Scaffold	GCA_002300785	ST437
GCA_000512165.1_Klebsiella_pneumoniae_Kp13_Complete_Genome	GCA_000512165	ST442
GCA_002631045.1_Klebsiella_pneumoniae_KPBr1_Contig	GCA_002631045	ST442
GCA_002851155.1_Klebsiella_pneumoniae_COL_Kpn15_Contig	GCA_002851155	ST442
GCA_000417485.1_Klebsiella_pneumoniae_DMC0799_Contig	GCA_000417485	ST45
GCA_000688535.1_Klebsiella_pneumoniae_CHS_21_Contig	GCA_000688535	ST45
GCA_000821805.1_Klebsiella_pneumoniae_Contig	GCA_000821805	ST45
GCA_000822385.1_Klebsiella_pneumoniae_Contig	GCA_000822385	ST45
GCA_000823005.1_Klebsiella_pneumoniae_Contig	GCA_000823005	ST45
GCA_000826795.1_Klebsiella_pneumoniae_UMNturkey9_Scaffold	GCA_000826795	ST45
GCA_001870165.1_Klebsiella_pneumoniae_CAV1016_Complete_Genome	GCA_001870165	ST45
GCA_002186855.1_Klebsiella_pneumoniae_PO1659_Contig	GCA_002186855	ST45
GCA_002187455.1_Klebsiella_pneumoniae_G1512_Contig	GCA_002187455	ST45
GCA_002187535.1_Klebsiella_pneumoniae_CAB1354_Contig	GCA_002187535	ST45
GCA_002187865.1_Klebsiella_pneumoniae_HB_AB_3196_Contig	GCA_002187865	ST45
GCA_002187915.1_Klebsiella_pneumoniae_HB_1051_Contig	GCA_002187915	ST45
GCA_002192315.1_Klebsiella_pneumoniae_AR_0126_Complete_Genome	GCA_002192315	ST45
GCA_002752955.1_Klebsiella_pneumoniae_QS17_0161_Complete_Genome	GCA_002752955	ST45
GCA_002775315.1_Klebsiella_pneumoniae_AUH_KIMP192_Contig	GCA_002775315	ST45
GCA_002775525.1_Klebsiella_pneumoniae_AUH_KIMP328_Contig	GCA_002775525	ST45
GCA_002776395.1_Klebsiella_pneumoniae_AUH_IMP485_Contig	GCA_002776395	ST45
GCA_002854635.1_Klebsiella_pneumoniae_COL_Kpn54_Contig	GCA_002854635	ST45
GCA_000821905.1_Klebsiella_pneumoniae_Contig	GCA_000821905	ST466
GCA_000822305.1_Klebsiella_pneumoniae_Contig	GCA_000822305	ST466
GCA_002751515.1_Klebsiella_pneumoniae_CF126_Scaffold	GCA_002751515	ST471
GCA_002751605.1_Klebsiella_pneumoniae_CF124_Scaffold	GCA_002751605	ST471
GCA_002751695.1_Klebsiella_pneumoniae_CF10728_Scaffold	GCA_002751695	ST471
GCA_000981955.1_Klebsiella_pneumoniae_MRSN_2404_Contig	GCA_000981955	ST48
GCA_000982085.1_Klebsiella_pneumoniae_HE12_Contig	GCA_000982085	ST48
GCA_000982215.1_Klebsiella_pneumoniae_MRSN_3562_Contig	GCA_000982215	ST48
GCA_001902935.3_Klebsiella_pneumoniae_1429_2334_Contig	GCA_001902935	ST48
GCA_002186465.1_Klebsiella_pneumoniae_UNMC_7905_Contig	GCA_002186465	ST48
GCA_002186635.1_Klebsiella_pneumoniae_PO457_Contig	GCA_002186635	ST48
GCA_002186775.1_Klebsiella_pneumoniae_PO2429_Contig	GCA_002186775	ST48
GCA_002186865.1_Klebsiella_pneumoniae_PO1516_Contig	GCA_002186865	ST48
GCA_002187475.1_Klebsiella_pneumoniae_G1015_Contig	GCA_002187475	ST48
GCA_002187775.1_Klebsiella_pneumoniae_PO2659_Contig	GCA_002187775	ST48
GCA_002187835.1_Klebsiella_pneumoniae_PO1758_Contig	GCA_002187835	ST48
GCA_002187995.1_Klebsiella_pneumoniae_G4049_Contig	GCA_002187995	ST48
GCA_002249125.1_Klebsiella_pneumoniae_KPPSTH06_Contig	GCA_002249125	ST48
GCA_002300665.1_Klebsiella_pneumoniae_BA2817_Scaffold	GCA_002300665	ST48
GCA_002850965.1_Klebsiella_pneumoniae_COL_Kpn29_Contig	GCA_002850965	ST48
GCA_900093115.1_Klebsiella_pneumoniae_PB484_Contig	GCA_900093115	ST48
GCA_000585875.1_Klebsiella_pneumoniae_KP3_S_Contig	GCA_000585875	ST512
GCA_000585895.1_Klebsiella_pneumoniae_KP4_R_Contig	GCA_000585895	ST512
GCA_000585915.1_Klebsiella_pneumoniae_KP2_R_Contig	GCA_000585915	ST512
GCA_000585935.1_Klebsiella_pneumoniae_KP5_R_Contig	GCA_000585935	ST512
GCA_000585955.1_Klebsiella_pneumoniae_KP1_I_Contig	GCA_000585955	ST512
GCA_000695285.2_Klebsiella_pneumoniae_KPB_1_Contig	GCA_000695285	ST512
GCA_000695305.2_Klebsiella_pneumoniae_KPB_2_Contig	GCA_000695305	ST512
GCA_000821385.1_Klebsiella_pneumoniae_Contig	GCA_000821385	ST512
GCA_000821405.1_Klebsiella_pneumoniae_Contig	GCA_000821405	ST512
GCA_000821425.1_Klebsiella_pneumoniae_Contig	GCA_000821425	ST512
GCA_000821445.1_Klebsiella_pneumoniae_Contig	GCA_000821445	ST512
GCA_000821845.1_Klebsiella_pneumoniae_Contig	GCA_000821845	ST512
GCA_000821865.1_Klebsiella_pneumoniae_Contig	GCA_000821865	ST512
GCA_000821885.1_Klebsiella_pneumoniae_Contig	GCA_000821885	ST512
GCA_000822045.1_Klebsiella_pneumoniae_Contig	GCA_000822045	ST512
GCA_000822065.1_Klebsiella_pneumoniae_Contig	GCA_000822065	ST512
GCA_000822085.1_Klebsiella_pneumoniae_Contig	GCA_000822085	ST512
GCA_000822165.1_Klebsiella_pneumoniae_Contig	GCA_000822165	ST512
GCA_000822365.1_Klebsiella_pneumoniae_Contig	GCA_000822365	ST512
GCA_000822625.1_Klebsiella_pneumoniae_Contig	GCA_000822625	ST512
GCA_000822845.1_Klebsiella_pneumoniae_Contig	GCA_000822845	ST512
GCA_000822865.1_Klebsiella_pneumoniae_Contig	GCA_000822865	ST512
GCA_000822885.1_Klebsiella_pneumoniae_Contig	GCA_000822885	ST512
GCA_000822905.1_Klebsiella_pneumoniae_Contig	GCA_000822905	ST512
GCA_000822925.1_Klebsiella_pneumoniae_Contig	GCA_000822925	ST512
GCA_000823065.1_Klebsiella_pneumoniae_Contig	GCA_000823065	ST512
GCA_001182385.1_Klebsiella_pneumoniae_KpVA_1_Contig	GCA_001182385	ST512
GCA_001182525.1_Klebsiella_pneumoniae_KpVA_8_Contig	GCA_001182525	ST512
GCA_001182545.1_Klebsiella_pneumoniae_KpVA_9_Contig	GCA_001182545	ST512
GCA_001182565.1_Klebsiella_pneumoniae_KpVA_10_Contig	GCA_001182565	ST512
GCA_001182585.1_Klebsiella_pneumoniae_KpVA_11_Contig	GCA_001182585	ST512
GCA_001182605.1_Klebsiella_pneumoniae_KpVA_12_Contig	GCA_001182605	ST512
GCA_001182625.1_Klebsiella_pneumoniae_KpVA_13_Contig	GCA_001182625	ST512
GCA_001182645.1_Klebsiella_pneumoniae_KpVA_14_Contig	GCA_001182645	ST512
GCA_001182665.1_Klebsiella_pneumoniae_KpVA_15_Contig	GCA_001182665	ST512
GCA_001182685.1_Klebsiella_pneumoniae_KpVA_16_Scaffold	GCA_001182685	ST512
GCA_001679915.1_Klebsiella_pneumoniae_KP_6884_Scaffold	GCA_001679915	ST512
GCA_001705385.1_Klebsiella_pneumoniae_blood_sample_2_Complete_Genome	GCA_001705385	ST512
GCA_001884765.1_Klebsiella_pneumoniae_KP04C62_Contig	GCA_001884765	ST512
GCA_002007665.1_Klebsiella_pneumoniae_KPN_KPC_HUG_07_Chromosome	GCA_002007665	ST512
GCA_002085855.1_Klebsiella_pneumoniae_KPN_KPC_HUG_08_Scaffold	GCA_002085855	ST512
GCA_002085865.1_Klebsiella_pneumoniae_KPN_KPC_HUG_09_Scaffold	GCA_002085865	ST512
GCA_002085895.1_Klebsiella_pneumoniae_KPN_KPC_HUG_11_Scaffold	GCA_002085895	ST512
GCA_002085915.1_Klebsiella_pneumoniae_KPN_KPC_HUG_10_Scaffold	GCA_002085915	ST512
GCA_002085935.1_Klebsiella_pneumoniae_KPN_KPC_HUG_12_Scaffold	GCA_002085935	ST512
GCA_002085975.1_Klebsiella_pneumoniae_KPN_KPC_HUG_13_Scaffold	GCA_002085975	ST512
GCA_002085995.1_Klebsiella_pneumoniae_KPN_KPC_HUG_B1_Scaffold	GCA_002085995	ST512
GCA_002086005.1_Klebsiella_pneumoniae_KPN_KPC_HUG_B3_Scaffold	GCA_002086005	ST512
GCA_002086025.1_Klebsiella_pneumoniae_KPN_KPC_HUG_B2_Scaffold	GCA_002086025	ST512
GCA_002086055.1_Klebsiella_pneumoniae_KPN_KPC_HUG_B4_Scaffold	GCA_002086055	ST512
GCA_002086095.1_Klebsiella_pneumoniae_KPN_KPC_HUG_B6_Scaffold	GCA_002086095	ST512
GCA_002119885.1_Klebsiella_pneumoniae_KL027_Contig	GCA_002119885	ST512
GCA_002119895.1_Klebsiella_pneumoniae_KL033_Contig	GCA_002119895	ST512
GCA_002120105.1_Klebsiella_pneumoniae_KL015_Contig	GCA_002120105	ST512
GCA_002150565.1_Klebsiella_pneumoniae_CNTD42_Contig	GCA_002150565	ST512
GCA_002150595.1_Klebsiella_pneumoniae_CNTD46_Contig	GCA_002150595	ST512
GCA_002150625.1_Klebsiella_pneumoniae_CNTD87_Contig	GCA_002150625	ST512
GCA_002150665.1_Klebsiella_pneumoniae_CNTD88_Contig	GCA_002150665	ST512
GCA_002235045.1_Klebsiella_pneumoniae_68_Contig	GCA_002235045	ST512
GCA_002235055.1_Klebsiella_pneumoniae_66_Scaffold	GCA_002235055	ST512
GCA_002235105.1_Klebsiella_pneumoniae_62_Scaffold	GCA_002235105	ST512
GCA_002235115.1_Klebsiella_pneumoniae_61_Scaffold	GCA_002235115	ST512
GCA_002235155.1_Klebsiella_pneumoniae_59_Scaffold	GCA_002235155	ST512
GCA_002235235.1_Klebsiella_pneumoniae_54_Contig	GCA_002235235	ST512
GCA_002235245.1_Klebsiella_pneumoniae_53_Contig	GCA_002235245	ST512
GCA_002235375.1_Klebsiella_pneumoniae_44_Scaffold	GCA_002235375	ST512
GCA_002235415.1_Klebsiella_pneumoniae_42_Scaffold	GCA_002235415	ST512
GCA_002235455.1_Klebsiella_pneumoniae_40_Scaffold	GCA_002235455	ST512
GCA_002235475.1_Klebsiella_pneumoniae_34_Scaffold	GCA_002235475	ST512
GCA_002235495.1_Klebsiella_pneumoniae_14_Contig	GCA_002235495	ST512
GCA_002235515.1_Klebsiella_pneumoniae_18_Contig	GCA_002235515	ST512
GCA_002235575.1_Klebsiella_pneumoniae_35_Contig	GCA_002235575	ST512
GCA_002235595.1_Klebsiella_pneumoniae_29_Contig	GCA_002235595	ST512
GCA_002235615.1_Klebsiella_pneumoniae_28_Scaffold	GCA_002235615	ST512
GCA_002235695.1_Klebsiella_pneumoniae_12_Contig	GCA_002235695	ST512
GCA_002235705.1_Klebsiella_pneumoniae_10_Contig	GCA_002235705	ST512
GCA_002235755.1_Klebsiella_pneumoniae_6_Contig	GCA_002235755	ST512
GCA_002235815.1_Klebsiella_pneumoniae_1_Contig	GCA_002235815	ST512
GCA_002235895.1_Klebsiella_pneumoniae_19_Contig	GCA_002235895	ST512
GCA_002236085.1_Klebsiella_pneumoniae_64_Contig	GCA_002236085	ST512
GCA_002236145.1_Klebsiella_pneumoniae_60_Scaffold	GCA_002236145	ST512
GCA_002236155.1_Klebsiella_pneumoniae_55_Scaffold	GCA_002236155	ST512
GCA_002236185.1_Klebsiella_pneumoniae_48_Scaffold	GCA_002236185	ST512
GCA_002236195.1_Klebsiella_pneumoniae_65_Contig	GCA_002236195	ST512
GCA_002236265.1_Klebsiella_pneumoniae_32_Scaffold	GCA_002236265	ST512
GCA_002236275.1_Klebsiella_pneumoniae_37_Scaffold	GCA_002236275	ST512
GCA_002236305.1_Klebsiella_pneumoniae_38_Scaffold	GCA_002236305	ST512
GCA_002236315.1_Klebsiella_pneumoniae_31_Scaffold	GCA_002236315	ST512
GCA_002236345.1_Klebsiella_pneumoniae_21_Scaffold	GCA_002236345	ST512
GCA_002236365.1_Klebsiella_pneumoniae_15_Contig	GCA_002236365	ST512
GCA_002236385.1_Klebsiella_pneumoniae_9_Contig	GCA_002236385	ST512
GCA_002236425.1_Klebsiella_pneumoniae_24_Scaffold	GCA_002236425	ST512
GCA_002236445.1_Klebsiella_pneumoniae_20_Contig	GCA_002236445	ST512
GCA_002854455.1_Klebsiella_pneumoniae_COL_Kpn69_Contig	GCA_002854455	ST512
GCA_002854525.1_Klebsiella_pneumoniae_COL_Kpn63_Contig	GCA_002854525	ST512
GCA_002855215.1_Klebsiella_pneumoniae_COL_Kpn68_Contig	GCA_002855215	ST512
GCA_000710805.1_Klebsiella_pneumoniae_T2_1_2_Contig	GCA_000710805	ST65
GCA_000710855.1_Klebsiella_pneumoniae_T2_1_Contig	GCA_000710855	ST65
GCA_000814805.1_Klebsiella_pneumoniae_1158_Complete_Genome	GCA_000814805	ST65
GCA_002108335.1_Klebsiella_pneumoniae_ARP_657_Scaffold	GCA_002108335	ST656
GCA_002108355.1_Klebsiella_pneumoniae_ARP_664_Scaffold	GCA_002108355	ST656
GCA_900092815.1_Klebsiella_pneumoniae_PB533_Scaffold	GCA_900092815	ST656
GCA_002795445.1_Klebsiella_pneumoniae_ID11_Contig	GCA_002795445	ST664
GCA_002795465.1_Klebsiella_pneumoniae_ID14_Contig	GCA_002795465	ST664
GCA_002795475.1_Klebsiella_pneumoniae_ID13_Contig	GCA_002795475	ST664
GCA_002795485.1_Klebsiella_pneumoniae_ID10_Contig	GCA_002795485	ST664
GCA_002795525.1_Klebsiella_pneumoniae_ID9_Contig	GCA_002795525	ST664
GCA_002795535.1_Klebsiella_pneumoniae_ID8_Contig	GCA_002795535	ST664
GCA_002795565.1_Klebsiella_pneumoniae_ID7_Contig	GCA_002795565	ST664
GCA_002795575.1_Klebsiella_pneumoniae_ID6_Contig	GCA_002795575	ST664
GCA_002795605.1_Klebsiella_pneumoniae_ID5_Contig	GCA_002795605	ST664
GCA_002795625.1_Klebsiella_pneumoniae_ID3_Contig	GCA_002795625	ST664
GCA_002795635.1_Klebsiella_pneumoniae_ID2_Contig	GCA_002795635	ST664
GCA_002795665.1_Klebsiella_pneumoniae_ID12_Contig	GCA_002795665	ST664
GCA_002795685.1_Klebsiella_pneumoniae_ID4_Contig	GCA_002795685	ST664
GCA_002795705.1_Klebsiella_pneumoniae_ID1_Contig	GCA_002795705	ST664
GCA_002187735.1_Klebsiella_pneumoniae_AK_1025_Contig	GCA_002187735	ST716
GCA_002187785.1_Klebsiella_pneumoniae_AK_1023_Contig	GCA_002187785	ST716
GCA_002187895.1_Klebsiella_pneumoniae_HB_4285_Contig	GCA_002187895	ST716
GCA_002188295.1_Klebsiella_pneumoniae_AK_1024_Contig	GCA_002188295	ST716
GCA_002235165.1_Klebsiella_pneumoniae_57_Scaffold	GCA_002235165	ST745
GCA_000338255.1_Klebsiella_pneumoniae_hvKP1_Contig	GCA_000338255	ST86
GCA_000474015.1_Klebsiella_pneumoniae_CG43_Complete_Genome	GCA_000474015	ST86
GCA_000813205.1_Klebsiella_pneumoniae_HK787_Complete_Genome	GCA_000813205	ST86
GCA_002116885.1_Klebsiella_pneumoniae_kp757_Complete_Genome	GCA_002116885	ST86
GCA_900079675.1_Klebsiella_pneumoniae_10271_Contig	GCA_900079675	ST86
GCA_002120065.1_Klebsiella_pneumoniae_KL064_Contig	GCA_002120065	ST868
GCA_900093345.1_Klebsiella_pneumoniae_W2_13_ERG1_Scaffold	GCA_900093345	ST895
GCA_900093415.1_Klebsiella_pneumoniae_W2_13_ERG7_Scaffold	GCA_900093415	ST895
GCA_900093425.1_Klebsiella_pneumoniae_W2_13_ERG8_Scaffold	GCA_900093425	ST895
GCA_900093435.1_Klebsiella_pneumoniae_W2_13_ERG11_Scaffold	GCA_900093435	ST895
GCA_002269895.1_Klebsiella_pneumoniae_B6_Contig	GCA_002269895	unassigned
GCA_000614665.1_Klebsiella_pneumoniae_JCM_1662_Contig	GCA_000614665	unassigned
GCA_000788005.1_Klebsiella_pneumoniae_101712_Scaffold	GCA_000788005	unassigned
GCA_001720625.1_Klebsiella_pneumoniae_SCPM_O_B_7846_Contig	GCA_001720625	unassigned
GCA_001720905.1_Klebsiella_pneumoniae_CFSAN044565_Contig	GCA_001720905	unassigned
GCA_001766695.1_Klebsiella_pneumoniae_B3639_Scaffold	GCA_001766695	unassigned
GCA_001879325.1_Klebsiella_pneumoniae_PM1134_Scaffold	GCA_001879325	unassigned
GCA_001879345.1_Klebsiella_pneumoniae_PM1995_Scaffold	GCA_001879345	unassigned
GCA_001901725.1_Klebsiella_pneumoniae_YMC2011_7_B36_Contig	GCA_001901725	unassigned
GCA_001901735.1_Klebsiella_pneumoniae_YMC2011_8_B10311_Contig	GCA_001901735	unassigned
GCA_001901755.1_Klebsiella_pneumoniae_YMC2011_7_B7207_Contig	GCA_001901755	unassigned
GCA_001938035.1_Klebsiella_pneumoniae_KLEB_LEB_Contig	GCA_001938035	unassigned
GCA_002182245.1_Klebsiella_pneumoniae_42809_Contig	GCA_002182245	unassigned
GCA_002182575.1_Klebsiella_pneumoniae_42195_Contig	GCA_002182575	unassigned
GCA_002185515.1_Klebsiella_pneumoniae_ARLG_2689_Contig	GCA_002185515	unassigned
GCA_002234875.1_Klebsiella_pneumoniae_KPM2895_Contig	GCA_002234875	unassigned
GCA_002248425.1_Klebsiella_pneumoniae_KPPUTH02_Contig	GCA_002248425	unassigned
GCA_002264905.1_Klebsiella_pneumoniae_K669_Contig	GCA_002264905	unassigned
GCA_002264915.1_Klebsiella_pneumoniae_K666_Contig	GCA_002264915	unassigned
GCA_002508285.1_Klebsiella_pneumoniae_Kp1210_Contig	GCA_002508285	unassigned
GCA_002738115.1_Klebsiella_pneumoniae_18ES_Scaffold	GCA_002738115	unassigned
GCA_002738325.1_Klebsiella_pneumoniae_VB1347_Scaffold	GCA_002738325	unassigned
GCA_002844785.1_Klebsiella_pneumoniae_BA2908_Scaffold	GCA_002844785	unassigned
GCA_002856155.1_Klebsiella_pneumoniae_C17_Scaffold	GCA_002856155	unassigned
GCA_900171715.1_Klebsiella_pneumoniae_VRES0591_Scaffold	GCA_900171715	unassigned
GCA_900171725.1_Klebsiella_pneumoniae_VRES0597_Scaffold	GCA_900171725	unassigned
GCA_900171745.1_Klebsiella_pneumoniae_VRES0601_Scaffold	GCA_900171745	unassigned
GCA_900171765.1_Klebsiella_pneumoniae_VRES0607_Scaffold	GCA_900171765	unassigned
GCA_900171775.1_Klebsiella_pneumoniae_VRES0575_Scaffold	GCA_900171775	unassigned
GCA_900171855.1_Klebsiella_pneumoniae_VRES0606_Scaffold	GCA_900171855	unassigned
GCA_900171895.1_Klebsiella_pneumoniae_VRES0590_Scaffold	GCA_900171895	unassigned
GCA_900171995.1_Klebsiella_pneumoniae_VRES0565_Scaffold	GCA_900171995	unassigned
GCA_900172045.1_Klebsiella_pneumoniae_VRES0593_Scaffold	GCA_900172045	unassigned
GCA_900172055.1_Klebsiella_pneumoniae_VRES0604_Scaffold	GCA_900172055	unassigned
GCA_900172125.1_Klebsiella_pneumoniae_VRES0589_Scaffold	GCA_900172125	unassigned
GCA_900172145.1_Klebsiella_pneumoniae_VRES0599_Scaffold	GCA_900172145	unassigned
GCA_900172435.1_Klebsiella_pneumoniae_VRES0609_Scaffold	GCA_900172435	unassigned
GCA_900172445.1_Klebsiella_pneumoniae_VRES0610_Scaffold	GCA_900172445	unassigned
GCA_900172455.1_Klebsiella_pneumoniae_VRES0611_Scaffold	GCA_900172455	unassigned
GCA_900172475.1_Klebsiella_pneumoniae_VRES0612_Scaffold	GCA_900172475	unassigned
GCA_900172485.1_Klebsiella_pneumoniae_VRES0592_Scaffold	GCA_900172485	unassigned
GCA_000821505.1_Klebsiella_pneumoniae_Contig	GCA_000821505	STtruncated
GCA_000822345.1_Klebsiella_pneumoniae_Scaffold	GCA_000822345	STtruncated
GCA_001982515.1_Klebsiella_pneumoniae_ICBKpBL_I_05_3_Contig	GCA_001982515	STtruncated
GCA_002854585.1_Klebsiella_pneumoniae_COL_Kpn57_Contig	GCA_002854585	STtruncated
