# Supplementary material for: Diversity, Virulence, and Antimicrobial Resistance in Isolates From the Newly Emerging Klebsiella pneumoniae ST101 Lineage
Source: Front Microbiol. 2019 Apr 2;10:542. doi: 10.3389/fmicb.2019.00542 (PMC6454207; doi:10.3389/fmicb.2019.00542)
Supplement: Supplementary file 6 [file Table_6.XLSX]

## Sheet: Sheet1
Table S6: ResFinder Genes screened
ARR-2_1_HQ141279
ARR-3_1_JF806499
ARR-3_4_FM207631
ARR-6_3_JF922883
aac(3)-IIa_1_CP023555
aac(3)-IIa_1_X51534
aac(3)-IIc_1_X54723
aac(3)-IId_1_EU022314
aac(3)-IIe_1_EU022315
aac(6')-Ib-11_1_AY136758
aac(6')-Ib-Hangzhou_1_FJ503047
aac(6')-Ib-Suzhou_1_EU085533
aac(6')-Ib-cr_1_DQ303918
aac(6')-Ib-cr_1_DQ303918_2
aac(6')-Ib-cr_2_EF636461
aac(6')-Ib-cr_2_EF636461_2
aac(6')-Ib3_1_X60321
aac(6')-Ib_1_M21682
aadA16_1_EU675686
aadA1_3_JQ414041
aadA1_4_JQ480156
aadA1_5_JX185132
aadA1b_1_M95287
aadA23_1_AJ809407
aadA2_1_NC010870
aadA2_1_X68227
aadA2_2_JQ364967
aadA3_1_AF047479
ac(6')-Ib_2_M23634
aph(3'')-Ib_1_M28829
aph(3'')-Ib_2_AF024602
aph(3'')-Ib_3_AF321550
aph(3'')-Ib_4_AF313472
aph(3'')-Ib_5_AF321551
aph(3')-Ia_10_EU855787
aph(3')-Ia_1_V00359
aph(3')-Ia_2_EU287476
aph(3')-Ia_3_EF015636
aph(3')-Ia_4_AF498082
aph(3')-Ia_5_AP004237
aph(3')-Ia_6_L05392
aph(3')-Ia_7_X62115
aph(3')-Ia_8_Y00452
aph(3')-Ia_9_EU722351
aph(3')-VI_1_KC170992
aph(3')-VI_2_APPJ01000012
aph(3')-VIa_1_X07753
aph(3')-VIb_1_AJ627643
aph(3')-VIj_1_KU922928
aph(6)-Id_1_M28829
aph(6)-Id_2_AF024602
aph(6)-Id_3_AB109805
aph(6)-Id_4_CP000971
aph(6)-Id_5_18676889
armA_1_AY220558
blaCTX-M-101_1_HQ398214
blaCTX-M-102_1_HQ398215
blaCTX-M-103_1_HG423149
blaCTX-M-104_1_HQ833652
blaCTX-M-105_1_HQ833651
blaCTX-M-10_1_AY598759
blaCTX-M-110_1_JF274242
blaCTX-M-111_1_JF274243
blaCTX-M-112_1_JF274246
blaCTX-M-113_1_JF274247
blaCTX-M-114_1_GQ351346
blaCTX-M-116_1_JF966749
blaCTX-M-117_1_JN227085
blaCTX-M-121_1_JN790862
blaCTX-M-122_1_JN790863
blaCTX-M-125_1_JQ724542
blaCTX-M-126_1_AB703103
blaCTX-M-127_1_MF196229
blaCTX-M-129_1_JX017364
blaCTX-M-12_1_DQ821704
blaCTX-M-130_1_JX017365
blaCTX-M-134_1_JX896165
blaCTX-M-136_1_KC351754
blaCTX-M-138_1_KF526119
blaCTX-M-139_1_KC107824
blaCTX-M-13_2_AF252623
blaCTX-M-142_1_KF240809
blaCTX-M-144_1_KJ020573
blaCTX-M-146_1_KY938173
blaCTX-M-147_1_KF513180
blaCTX-M-148_1_KJ020574
blaCTX-M-14_1_AF252622
blaCTX-M-14b_1_DQ359215
blaCTX-M-150_1_KF769131
blaCTX-M-155_1_KM211508
blaCTX-M-156_1_KM211509
blaCTX-M-157_1_KM211510
blaCTX-M-158_1_KM211691
blaCTX-M-159_1_AB976602
blaCTX-M-15_1_AY044436
blaCTX-M-161_1_KP128034
blaCTX-M-162_1_KP681697
blaCTX-M-163_1_KP681698
blaCTX-M-164_1_KP727571
blaCTX-M-166_1_KU978909
blaCTX-M-167_1_KR537428
blaCTX-M-168_1_KR537429
blaCTX-M-169_1_KR779864
blaCTX-M-16_1_AY029068
blaCTX-M-170_1_KR822223
blaCTX-M-172_1_KT251041
blaCTX-M-173_1_KT997884
blaCTX-M-174_1_KT997886
blaCTX-M-175_1_KT997887
blaCTX-M-176_1_KT997888
blaCTX-M-177_1_KT997889
blaCTX-M-179_1_KU705393
blaCTX-M-17_1_AY033516
blaCTX-M-180_1_KX056899
blaCTX-M-181_1_KX056900
blaCTX-M-182_1_KX056901
blaCTX-M-183_1_KX263246
blaCTX-M-184_1_KX263247
blaCTX-M-186_1_KX446939
blaCTX-M-188_1_KX676491
blaCTX-M-189_1_FJ657512
blaCTX-M-190_1_KX664469
blaCTX-M-191_1_KY271097
blaCTX-M-192_1_KY271098
blaCTX-M-193_1_KY563766
blaCTX-M-194_1_KY563767
blaCTX-M-195_1_KY563768
blaCTX-M-196_1_KY563769
blaCTX-M-197_1_KY646303
blaCTX-M-198_1_KY646304
blaCTX-M-19_1_AF325134
blaCTX-M-1_1_DQ915955
blaCTX-M-202_1_MF195067
blaCTX-M-203_1_MF196230
blaCTX-M-204_1_MF281085
blaCTX-M-206_1_KJ802520
blaCTX-M-207_1_LC348384
blaCTX-M-208_1_MH067958
blaCTX-M-209_1_MH067959
blaCTX-M-210_1_MH067960
blaCTX-M-211_1_MH067961
blaCTX-M-212_1_MH067962
blaCTX-M-213_1_MH094805
blaCTX-M-214_1_MH121688
blaCTX-M-216_1_MH243352
blaCTX-M-218_1_MH243358
blaCTX-M-219_1_CP019080
blaCTX-M-21_1_AJ416346
blaCTX-M-220_1_MH450163
blaCTX-M-22_1_AY080894
blaCTX-M-23_1_AF488377
blaCTX-M-24_1_EF374096
blaCTX-M-27_1_AY156923
blaCTX-M-28_6_AJ549244
blaCTX-M-29_1_AY267213
blaCTX-M-30_1_AY292654
blaCTX-M-32_2_AJ557142
blaCTX-M-33_1_AY238472
blaCTX-M-34_1_AY515297
blaCTX-M-36_1_AB177384
blaCTX-M-37_1_AY649755
blaCTX-M-38_1_AY822595
blaCTX-M-3_1_Y10278
blaCTX-M-42_1_DQ061159
blaCTX-M-46_1_AY847147
blaCTX-M-47_1_AY847143
blaCTX-M-48_1_AY847144
blaCTX-M-49_1_AY847145
blaCTX-M-50_1_AY847146
blaCTX-M-51_1_DQ211987
blaCTX-M-52_1_DQ223685
blaCTX-M-53_1_DQ268764
blaCTX-M-54_1_DQ303459
blaCTX-M-55_1_DQ810789
blaCTX-M-58_1_EF210159
blaCTX-M-60_1_AM411407
blaCTX-M-61_1_EF219142
blaCTX-M-62_1_EF219134
blaCTX-M-65_1_EF418608
blaCTX-M-66_1_EF576988
blaCTX-M-69_1_EU402393
blaCTX-M-71_1_FJ815436
blaCTX-M-72_1_AY847148
blaCTX-M-73_1_DQ343292
blaCTX-M-79_1_EF426798
blaCTX-M-80_1_EU202673
blaCTX-M-81_1_EU136031
blaCTX-M-82_1_DQ256091
blaCTX-M-83_1_FJ214366
blaCTX-M-84_1_FJ214367
blaCTX-M-85_1_FJ214368
blaCTX-M-86_1_FJ214369
blaCTX-M-87_1_EU545409
blaCTX-M-88_1_FJ873739
blaCTX-M-90_1_FJ907381
blaCTX-M-93_1_HQ166709
blaCTX-M-96_1_AJ704396
blaCTX-M-98_1_HM755448
blaCTX-M-99_1_HM803271
blaCTX-M-9_1_AF174129
blaGES-10_1_FJ820124
blaGES-11_1_FJ854362
blaGES-12_1_FN554543
blaGES-13_1_GU169702
blaGES-14_1_GU207844
blaGES-15_1_GU208678
blaGES-16_1_HM173356
blaGES-17_1_HQ874631
blaGES-18_1_JQ028729
blaGES-19_1_JN596280
blaGES-1_1_HQ170511
blaGES-20_1_JN596280
blaGES-21_1_JQ772478
blaGES-22_1_JX023441
blaGES-2_1_AF326355
blaGES-3_1_AB113580
blaGES-4_1_AB116723
blaGES-5_1_DQ236171
blaGES-6_1_AY494718
blaGES-7_1_HM453325
blaGES-8_1_AF329699
blaGES-9_1_AY920928
blaKPC-10_1_GQ140348
blaKPC-11_1_HM066995
blaKPC-12_1_HQ641422
blaKPC-13_1_HQ342889
blaKPC-14_1_JX524191
blaKPC-15_1_KC433553
blaKPC-16_1_KC465199
blaKPC-17_1_KC465200
blaKPC-18_1_KT884517
blaKPC-19_1_KJ775801
blaKPC-21_1_LN609376
blaKPC-22_1_KM379100
blaKPC-23_1_MH450213
blaKPC-24_1_KR052099
blaKPC-25_1_KU216748
blaKPC-26_1_KX619622
blaKPC-27_1_KX828722
blaKPC-28_1_KY282958
blaKPC-2_1_AY034847
blaKPC-30_1_KY646302
blaKPC-31_1_MAPH01000113
blaKPC-32_1_MAPO01000050
blaKPC-33_1_CP025144
blaKPC-35_1_MH404098
blaKPC-3_1_HM769262
blaKPC-4_1_FJ473382
blaKPC-5_1_EU400222
blaKPC-6_1_EU555534
blaKPC-7_1_EU729727
blaKPC-8_1_FJ234412
blaKPC-9_1_FJ624872
blaNDM-10_1_KF361506
blaNDM-11_1_KP265939
blaNDM-12_1_AB926431
blaNDM-13_1_LC012596
blaNDM-14_1_KM210086
blaNDM-15_1_KP735848
blaNDM-16_1_KP862821
blaNDM-17_1_KX812714
blaNDM-19_1_MF370080
blaNDM-1_1_FN396876
blaNDM-20_1_KY654092
blaNDM-21_1_MG183694
blaNDM-22_1_MH243357
blaNDM-23_1_MH450214
blaNDM-24_1_MH450215
blaNDM-2_1_JF703135
blaNDM-3_1_JQ734687
blaNDM-4_1_JQ348841
blaNDM-5_1_JN104597
blaNDM-6_1_JN967644
blaNDM-7_1_JX262694
blaNDM-8_1_AB744718
blaNDM-9_1_KC999080
blaOXA-199_1_JN704570
blaOXA-1_1_HQ170510
blaOXA-204_1_KP027885
blaOXA-224_1_JN412067
blaOXA-244_1_KP659189
blaOXA-245_1_JX438001
blaOXA-252_1_NG050608
blaOXA-47_1_AY237830
blaOXA-48_2_AY236073
blaOXA-4_1_AY162283
blaOXA-505_1_KU531433
blaOXA-514_1_KU866382
blaOXA-515_1_KU866383
blaOXA-517_1_KU878974
blaOXA-519_1_KX349732
blaOXA-534_1_KX714285
blaOXA-538_1_KX827284
blaOXA-546_1_KY682756
blaOXA-547_1_KY684124
blaOXA-566_1_MF099636
blaOXA-9_1_KQ089875
blaSCO-1_1_EF063111
blaSHV-101_1_EU155018
blaSHV-102_1_EU024485
blaSHV-103_1_EU032604
blaSHV-104_1_EU274581
blaSHV-105_1_FJ194944
blaSHV-106_1_AM922307
blaSHV-107_1_AM922308
blaSHV-108_1_AM922309
blaSHV-109_1_EU418913
blaSHV-110_1_HQ877615
blaSHV-111_1_AB372881
blaSHV-119_1_JX192924
blaSHV-11_1_X98101
blaSHV-120_1_JF812965
blaSHV-121_1_GQ428198
blaSHV-128_1_GU932590
blaSHV-129_1_GU827715
blaSHV-12_1_KF976405
blaSHV-132_1_GU981741
blaSHV-133_1_AB551737
blaSHV-134_1_HM559945
blaSHV-135_1_HQ637576
blaSHV-137_1_HQ661363
blaSHV-13_1_AF164577
blaSHV-141_1_JQ388884
blaSHV-142_1_JQ029959
blaSHV-143_1_JQ341060
blaSHV-144_1_JQ926986
blaSHV-145_1_JX013655
blaSHV-147_1_JX121114
blaSHV-148_1_JX121115
blaSHV-149_1_JX121116
blaSHV-14_1_AF226622
blaSHV-150_1_JX121117
blaSHV-151_1_JX121118
blaSHV-152_1_JX121119
blaSHV-153_1_JX121120
blaSHV-154_1_JX121121
blaSHV-155_1_JX121122
blaSHV-156_1_JX121123
blaSHV-157_1_JX121124
blaSHV-158_1_JX121125
blaSHV-159_1_JX121126
blaSHV-15_1_AJ011428
blaSHV-160_1_JX121127
blaSHV-161_1_JX121128
blaSHV-162_1_JX121129
blaSHV-163_1_JX121130
blaSHV-164_1_HE981194
blaSHV-165_1_JX121131
blaSHV-168_1_JX870080
blaSHV-172_1_KF513177
blaSHV-173_1_KF513178
blaSHV-178_1_KF705209
blaSHV-179_1_KF705208
blaSHV-180_1_KP050487
blaSHV-182_1_KP050489
blaSHV-183_1_HG934764
blaSHV-185_1_KM233164
blaSHV-186_1_KM233165
blaSHV-187_1_LN515533
blaSHV-188_1_LN515534
blaSHV-189_1_KP050494
blaSHV-18_1_AF132290
blaSHV-190_1_KP868753
blaSHV-191_1_KP868754
blaSHV-193_1_KR347170
blaSHV-194_1_KX421191
blaSHV-195_1_KX619652
blaSHV-196_1_KX714286
blaSHV-197_1_KT946904
blaSHV-198_1_MF281086
blaSHV-199_1_MF373391
blaSHV-1_1_AF148850
blaSHV-1b-b_1_DQ166783
blaSHV-200_1_MF871643
blaSHV-203_1_MG028656
blaSHV-204_1_MH243356
blaSHV-24_1_AB023477
blaSHV-25_1_AF208796
blaSHV-26_1_AF227204
blaSHV-27_1_AF293345
blaSHV-28_1_AF299299
blaSHV-29_1_AF301532
blaSHV-2_1_AF148851
blaSHV-2a_1_X98102
blaSHV-30_1_AY661885
blaSHV-31_1_AY277255
blaSHV-32_1_AY037778
blaSHV-33_1_AY037779
blaSHV-34_1_AY036620
blaSHV-35_1_AY070258
blaSHV-36_1_AF467947
blaSHV-36_1_AF467947_2
blaSHV-37_1_AF467948
blaSHV-38_1_AY079099
blaSHV-3_1_KX092356
blaSHV-40_1_AF535128
blaSHV-41_1_AF535129
blaSHV-42_1_AF535130
blaSHV-43_1_AY065991
blaSHV-44_1_AY259119
blaSHV-45_1_AF547625
blaSHV-46_1_AY210887
blaSHV-48_1_AY263404
blaSHV-49_1_AY528718
blaSHV-50_1_AY288915
blaSHV-51_1_AY289548
blaSHV-52_1_HQ845196
blaSHV-55_1_DQ054528
blaSHV-56_1_EU586041
blaSHV-57_1_AY223863
blaSHV-59_1_AY790341
blaSHV-5_1_X55640
blaSHV-60_1_AB302939
blaSHV-61_1_AJ866284
blaSHV-62_1_AJ866285
blaSHV-63_1_EU342351
blaSHV-64_1_DQ174304
blaSHV-65_1_DQ174305
blaSHV-66_1_DQ174306
blaSHV-67_1_DQ174307
blaSHV-69_1_DQ174308
blaSHV-70_1_DQ013287
blaSHV-71_1_AM176546
blaSHV-72_1_AM176547
blaSHV-73_1_AM176548
blaSHV-74_1_AM176549
blaSHV-75_1_AM176550
blaSHV-76_1_AM176551
blaSHV-77_1_EF373975
blaSHV-78_1_AM176553
blaSHV-79_1_AM176554
blaSHV-7_1_U20270
blaSHV-80_1_AM176555
blaSHV-81_1_AM176556
blaSHV-82_1_AM176557
blaSHV-85_1_DQ322460
blaSHV-86_1_DQ328802
blaSHV-89_1_DQ193536
blaSHV-8_1_U92041
blaSHV-92_1_DQ836922
blaSHV-93_1_EF373969
blaSHV-94_1_EF373970
blaSHV-95_1_EF373972
blaSHV-96_1_EF373971
blaSHV-97_1_EF373973
blaSHV-98_1_AM941844
blaSHV-99_1_AM941845
blaSHV-9_1_S82452
blaTEM-101_1_AF495873
blaTEM-102_1_AY040093
blaTEM-104_1_AF516719
blaTEM-105_1_AF516720
blaTEM-106_1_AY101578
blaTEM-107_1_AY101764
blaTEM-108_1_AF506748
blaTEM-109_1_AY628175
blaTEM-10_1_AF093512
blaTEM-110_1_AY072920
blaTEM-111_1_AF468003
blaTEM-112_1_AY589493
blaTEM-113_1_AY589494
blaTEM-114_1_AY589495
blaTEM-115_1_AF535127
blaTEM-116_1_AY425988
blaTEM-11_1_AY874537
blaTEM-120_1_AY243512
blaTEM-121_1_AY307374
blaTEM-122_1_AY307100
blaTEM-123_1_AY327539
blaTEM-124_1_AY327540
blaTEM-125_1_AY628176
blaTEM-126_1_AY628199
blaTEM-127_1_AY368236
blaTEM-128_1_AY368237
blaTEM-129_1_AJ746225
blaTEM-12_1_M88143
blaTEM-130_1_AJ866988
blaTEM-131_1_AY436361
blaTEM-132_1_AY491682
blaTEM-133_1_AY528425
blaTEM-134_1_AY574271
blaTEM-135_1_GQ896333
blaTEM-136_1_AY826417
blaTEM-137_1_AM286274
blaTEM-138_1_AY853593
blaTEM-139_1_DQ072853
blaTEM-141_1_AY956335
blaTEM-142_1_DQ388882
blaTEM-143_1_DQ075245
blaTEM-144_1_AM049400
blaTEM-145_1_DQ105528
blaTEM-146_1_DQ105529
blaTEM-147_1_DQ279850
blaTEM-148_1_AM087454
blaTEM-149_1_DQ369751
blaTEM-150_1_AM183304
blaTEM-151_1_DQ834729
blaTEM-152_1_DQ834728
blaTEM-153_1_KC149518
blaTEM-154_1_FJ807656
blaTEM-155_1_DQ679961
blaTEM-156_1_AM941159
blaTEM-157_1_DQ909059
blaTEM-158_1_EF534736
blaTEM-159_1_EF136376
blaTEM-15_1_AM849805
blaTEM-160_1_EF136377
blaTEM-162_1_EF468463
blaTEM-163_1_EU815939
blaTEM-164_1_EU274580
blaTEM-166_1_FJ197316
blaTEM-167_1_FJ360884
blaTEM-168_1_FJ919776
blaTEM-169_1_KP012538
blaTEM-16_1_X65254
blaTEM-171_1_GQ149347
blaTEM-176_1_GU550123
blaTEM-177_1_FN652295
blaTEM-178_1_X97254
blaTEM-17_1_Y14574
blaTEM-181_1_KM977568
blaTEM-182_1_HQ317449
blaTEM-183_1_HQ529916
blaTEM-184_1_FR848831
blaTEM-185_1_JF795538
blaTEM-186_1_JN227084
blaTEM-187_1_HM246246
blaTEM-188_1_JN211012
blaTEM-189_1_JN254627
blaTEM-190_1_JN416112
blaTEM-191_1_KY432484
blaTEM-193_1_JN935135
blaTEM-194_1_JN935136
blaTEM-195_1_JN935137
blaTEM-196_1_JQ034306
blaTEM-197_1_HQ877606
blaTEM-198_1_AB700703
blaTEM-19_1_JX042489
blaTEM-1A_1_HM749966
blaTEM-1B_1_AY458016
blaTEM-1C_1_FJ560503
blaTEM-1D_1_AF188200
blaTEM-201_1_JX310327
blaTEM-205_1_KC900516
blaTEM-206_1_KC783461
blaTEM-207_1_KC818234
blaTEM-208_1_KC865667
blaTEM-209_1_KF240808
blaTEM-20_1_EU527189
blaTEM-210_1_KJ484630
blaTEM-211_1_KF513179
blaTEM-212_1_KF481968
blaTEM-213_1_LJEE02000034
blaTEM-214_1_KP050491
blaTEM-215_1_KP050492
blaTEM-216_1_KF944358
blaTEM-217_1_HG934763
blaTEM-219_1_KM114268
blaTEM-21_1_Y17582
blaTEM-220_1_KM998962
blaTEM-224_1_KU664545
blaTEM-225_1_KY432403
blaTEM-226_1_KY646301
blaTEM-227_1_KY418040
blaTEM-229_1_MG821356
blaTEM-22_1_Y17583
blaTEM-230_1_MG821377
blaTEM-231_1_MG821378
blaTEM-232_1_MH079593
blaTEM-233_1_MH270416
blaTEM-234_1_MH243353
blaTEM-24_1_GQ293500
blaTEM-26_1_LDCJ01000052
blaTEM-28_1_U37195
blaTEM-29_1_DQ269440
blaTEM-2_1_X54606
blaTEM-2_2_AJ251946
blaTEM-30_1_AJ437107
blaTEM-32_1_CXLQ01000061
blaTEM-33_1_GU371926
blaTEM-34_1_KC292503
blaTEM-35_1_KP860986
blaTEM-36_1_KY305958
blaTEM-3_1_X64523
blaTEM-40_1_FR717535
blaTEM-43_1_U95363
blaTEM-45_1_X95401
blaTEM-47_1_Y10279
blaTEM-48_1_Y10280
blaTEM-49_1_Y10281
blaTEM-4_1_LK391770
blaTEM-52B_1_AF027199
blaTEM-52C_2_EF141186
blaTEM-52_1_Y13612
blaTEM-53_1_AF104441
blaTEM-54_1_AF104442
blaTEM-55_1_DQ286729
blaTEM-57_1_FJ405211
blaTEM-60_1_AF047171
blaTEM-63_1_AF332513
blaTEM-67_1_AF091113
blaTEM-68_1_AJ239002
blaTEM-6_1_X57972
blaTEM-70_1_AF188199
blaTEM-71_1_AF203816
blaTEM-72_1_AF157553
blaTEM-76_1_AF190694
blaTEM-77_1_AF190695
blaTEM-78_1_AF190693
blaTEM-79_1_AF190692
blaTEM-80_1_AF347054
blaTEM-81_1_AF427127
blaTEM-82_1_AF427128
blaTEM-83_1_AF427129
blaTEM-84_1_AF427130
blaTEM-85_1_AJ277414
blaTEM-86_1_AJ277415
blaTEM-87_1_AF250872
blaTEM-88_1_AY027590
blaTEM-8_1_X65252
blaTEM-90_1_AF351241
blaTEM-91_1_AB049569
blaTEM-92_1_AF143804
blaTEM-93_1_AJ318093
blaTEM-94_1_AJ318094
blaTEM-95_1_AJ308558
blaTEM-96_1_AY092401
blaTEM-97_1_AF397067
blaTEM-98_1_AF397068
blaTEM-99_1_AF397066
blaTEM-9_1_KY271103
cmlA1_1_M64556
cmlA1_2_AB212941
dfrA14_1_KF921535
dfrA14_2_Z50805
dfrA14_3_Z50804
dfrA14_4_AF393510
dfrA14_5_DQ388123
dfrA1_10_AF203818
dfrA1_11_AJ419168
dfrA1_12_AY141977
dfrA1_13_DQ018382
dfrA1_14_AB199789
dfrA1_15_FM207631
dfrA1_16_FJ001872
dfrA1_17_FJ489928
dfrA1_1_FJ591049
dfrA1_2_HM055363
dfrA1_3_GU726913
dfrA1_4_AB188271
dfrA1_5_EU089668
dfrA1_6_FJ215857
dfrA1_8_X00926
dfrA1_9_AJ238350
dfrA27_1_FJ459817
dfrA28_2_FM877476
dfrA5_1_X12868
dfrA5_2_FJ001870
dfrA5_3_KF030794
dfrA5_4_AY139589
ere(A)_2_AF099140
ere(A)_3_AF326209
ere(A)_4_AF512546
ere(B)_1_A15097
ere(B)_2_X03988
floR_1_AF071555
floR_2_AF118107
fosA5_1_EU195449
fosA_6_ACZD01000244
mph(A)_1_D16251
mph(A)_2_U36578
mph(E)_1_DQ839391
mph(E)_2_JF769133
msr(E)_4_EU294228
oqxA_1_EU370913
oqxB_1_EU370913
qnrB15_1_EU302865
qnrB16_1_EU136183
qnrB17_1_JN173051
qnrB17_2_AM919398
qnrB18_1_AM919399
qnrB1_1_DQ351241
qnrB20_1_AB379831
qnrB26_1_HQ386846
qnrB29_1_HM439649
qnrB30_1_HM439650
qnrB3_1_DQ303920
qnrB41_1_JN166690
qnrB42_1_JN680743
qnrB43_1_JQ349151
qnrB44_1_JQ349153
qnrB45_1_JQ349152
qnrB66_1_KC580655
qnrB6_1_EF520349
qnrB6_2_EF523819
qnrB74_1_KJ415247
qnrB75_1_KP207591
qnrB77_1_KM985470
qnrB80_1_KM985473
qnrB9_1_EF526508
qnrS1_1_AB187515
qnrS3_1_EU077611
qnrS4_1_FJ418153
qnrS7_1_KF730651
qnrS8_1_KF730652
qnrS9_1_KF732714
rmtC_1_AB194779
rmtf_1_JQ808129
strA_1_M96392
sul1_10_DQ143913
sul1_11_DQ914960
sul1_14_AJ517791
sul1_15_EF667294
sul1_17_AM746675
sul1_18_AY260546
sul1_19_DQ125241
sul1_20_JF262165
sul1_21_AJ971344
sul1_22_AY115475
sul1_23_AJ621187
sul1_24_EU117158
sul1_25_AY878717
sul1_26_AY524415
sul1_27_GU562437
sul1_28_JN790946
sul1_29_AJ746361
sul1_2_U12338
sul1_30_JF262178
sul1_31_AM040449
sul1_32_EF592571
sul1_33_AJ564903
sul1_34_AY047357
sul1_35_AB281182
sul1_36_X15024
sul1_37_AF188331
sul1_38_BX248359
sul1_39_AY522923
sul1_3_EU855787
sul1_5_EU780013
sul1_7_FJ715937
sul1_8_JN581942
sul1_9_AY963803
sul2_10_AM183225
sul2_11_AY232670
sul2_12_AF497970
sul2_13_AJ289135
sul2_14_AJ514834
sul2_15_FJ968160
sul2_17_U57647
sul2_18_AJ830714
sul2_19_AJ319822
sul2_1_AF542061
sul2_20_AJ830710
sul2_21_AB366440
sul2_2_AY034138
sul2_3_HQ840942
sul2_5_AY524415
sul2_6_FN995456
sul2_7_HM486907
sul2_8_AJ877041
sul2_9_FJ197818
sul3_2_AJ459418
tet(A)_1_AJ313332
tet(A)_2_X00006
tet(A)_3_AY196695
tet(A)_4_AJ517790
tet(A)_5_AJ419171
tet(A)_6_AF534183
tet(D)_1_AF467077
tet(D)_2_X65876
